1                    **Cerebral dopamine neurotrophic factor (CDNF) reduces myocardial**  
2                    **ischemia/reperfusion injuries by the activation of PI3K-AKT via KDEL-receptor**  
3                    **binding**

4        Leonardo Maciel <sup>1#</sup>; Dahienne Ferreira de Oliveira <sup>2#</sup>; Fernanda Mesquita<sup>1</sup>; Hercules Antônio  
5                    da Silva Souza<sup>1</sup>; Leandro Oliveira<sup>2</sup>; Fernando L. Palhano<sup>2</sup>; Antônio Carlos Campos de  
6                    Carvalho<sup>1</sup>; José Hamilton Matheus Nascimento<sup>1</sup>; Debora Foguel, PhD<sup>2\*\*</sup>

7        **1** Instituto de Biofísica Carlos Chagas Filho, Universidade Federal do Rio de Janeiro, Rio de  
8                    Janeiro, Brazil.

9        Leonardo Maciel, Fernanda Mesquita, Hercules Antônio da Silva Souza, Antônio Carlos  
10                    Campos de Carvalho, José Hamilton Matheus Nascimento.

11        **2** Instituto de Bioquímica Médica Leopoldo de Meis, Rio de Janeiro, Universidade Federal do  
12                    Rio de Janeiro, Brazil.

13        Dahienne Ferreira de Oliveira, Leandro Oliveira, Fernando L. Palhano, Debora Foguel.

14        # Contributed equally as first author

15        \*\* To whom correspondence should be addressed

16        Debora Foguel  
17                    foguel@bioqmed.ufrj.br  
18                    Full Professor of Biochemistry  
19                    Instituto de Bioquímica Médica Leopoldo de Meis  
20                    Universidade Federal do Rio de Janeiro - Centro de Ciências da Saúde  
21                    Av. Carlos Chagas Filho 373, Bloco E, sala 42  
22                    Ilha do Fundão, Rio de Janeiro, RJ  
23                    Brazil - CEP: 21941-902

25        **Short Title:** CDNF confers cardioprotection in ischemia/reperfusion

26  
27

28  
29

## 30    **Abstract**

31    CDNF (Cerebral Dopamine Neurotrophic Factor) belongs to a new family of NF, which  
 32    presents several beneficial activities beyond the brain. Little is known about CDNF in the  
 33    cardiac context. Herein we investigate CDNF effects in cardiomyocytes under endoplasmic  
 34    reticulum (ER)-stress and in whole rat hearts subjected to ischemia/reperfusion (I/R). We  
 35    showed that CDNF is secreted by cardiomyocytes stressed by thapsigargin and by isolated  
 36    hearts subjected to I/R. CDNF protects human and mouse cardiomyocytes against ER-stress  
 37    by restoring the calcium transient, and isolated heart against I/R injuries by reducing the  
 38    infarct area and avoiding mitochondrial impairment. This protection is abrogated by  
 39    wortmannin (PI3K- inhibitor) or by heptapeptides containing KDEL sequence, which block  
 40    KDEL-receptor. These data suggest that CDNF induces cardioprotection via KDEL receptor  
 41    binding and PI3K/AKT activation. This is the first study to propose CDNF as a cardiomyokine  
 42    and to unravel the receptor and signaling pathway for this interesting family of NF.

43    **Key words: CDNF, cardioprotection, KDEL-R, PI3K-AKT**

## 44 Introduction

45 CDNF (cerebral dopamine neurotrophic factor) together with MANF (mesencephalic  
46 astrocyte derived neurotrophic factor) form a new family of neurotrophic factors (NF) that are  
47 structurally unrelated to the other three families of NF (Lindahl et al., 2017). Human CDNF  
48 shares 59% amino-acid identity with human MANF and both have signal peptides that address  
49 them to the endoplasmic/sarcoplasmatic reticulum (ER/SR) (Liu et al., 2015; Lindahl et al.,  
50 2017).

51 Our group was the first to solve by nuclear magnetic resonance spectroscopy the  
52 structure of full-length human CDNF in solution, revealing a protein with two folded domains,  
53 the N- and the C-domains, with perfect superposition to the MANF structure (Latge et al.,  
54 2015). Several studies have elucidated the striking effects of MANF and CDNF in protecting  
55 neuronal cells against several injuries (reviewed in Lindahl et al., 2017), specially the  
56 dopaminergic neurons (Lindholm et al., 2007; Latge et al., 2015), thereby identifying these  
57 NFs as candidates for PD therapy (Voutilainen et al., 2011; Bäck et al., 2013; Voutilainen et  
58 al., 2015; Sampaio et al., 2017).

59 Although the precise mechanism(s) of action of MANF and CDNF is not completely  
60 understood, ER/SR stress relief seems to be one of their main activities. Several studies have  
61 shown that MANF and CDNF are induced by ER/SR stress (Apostolou et al., 2008; Tadimalla  
62 et al., 2008; Glembotski et al., 2012; Hartley et al., 2013; Liu et al., 2015). ER/SR stress has  
63 been implicated in a series of insults, including reduction in ER/SR calcium stores, oxidative  
64 stress, and an altered protein glycosylation pattern, among others. All of these cause the  
65 accumulation of misfolded proteins in the ER/SR, triggering a series of cellular events,  
66 collectively called the unfolding protein response (UPR). UPR activates the translation of a set  
67 of very specific proteins, which relieve the stress and, if necessary, induce cell apoptosis  
68 (Hetzel, 2012; Lee et al., 2013;).

69 ER/SR stress has been implicated in human pathologies such as neurodegenerative  
70 and cardiac diseases, diabetes etc. Different from other proteins involved in ER/SR stress,  
71 MANF and CDNF are secreted to the extracellular milieu where they exert  
72 autocrine/paracrine/endocrine effects (Sun et al., 2011; Glembotski et al., 2012; Oh-Hashi et  
73 al., 2012; Liu et al., 2018). Interestingly, MANF and CDNF have in their C-terminal portion  
74 the sequences RTDL or KTEL, respectively. These sequences closely resemble the classical  
75 ER/SR retention signal, KDEL (Lys-Asp-Glu-Leu), which has a high affinity for KDEL-

receptors (KDEL-R). This sequence is present in several ER/SR-resident proteins such as GRP78 (glucose-regulated protein 78), calreticulin and PDI (protein disulfide isomerase) (Raykhel et al., 2007; Capitani et al., 2009), for instance. The KDEL-R is involved in the retrieval of proteins from Golgi back to ER/SR, avoiding their secretion. The presence of degenerated KDEL sequences in MANF and CDNF suggests that their affinity for KDEL-R is diminished, which contributes to their increased secretion (Glembotski et al., 2012). Indeed, deletion of the RTDL sequence from MANF enhances its secretion in mouse mesencephalic astrocytes, suggesting that MANF-KDEL-R interaction in the ER/SR compartment regulates MANF secretion (Oh-Hashi et al., 2012).

The cardioprotective activity of MANF has been investigated in detail (Tadimalla et al., 2008; Glembotski et al., 2011; Glembotski et al., 2012), but even though the heart and skeletal muscle express relatively high amounts of CDNF (Lindholm et al., 2007), there is only one report in the literature showing increased levels of CDNF expression in ER/SR stressed cells. Tunicamycin (TN), an ER/SR stressor, raised the expression of CDNF in H9C2 cells, a rat cardiomyoblast cell line, while a CDNF-hemagglutinin construct enhanced resistance of cardiomyocytes to TN, reducing apoptosis (Liu et al., 2018). However, the authors investigated neither the mechanism of action of CDNF nor its role to cardiac functions.

The main goal of the present study was to investigate CDNF effects in cardiomyocytes. By using isolated hearts from rats and cell culture of cardiomyocytes from mice as well as human induced pluripotent stem cells differentiated into cardiomyocytes (hiPSC-dCM), we show that CDNF is secreted by cardiomyocytes when calcium stores are disturbed by thapsigargin (TG), an ER stressor, and in isolated hearts subjected to ischemia/reperfusion (I/R). Exogenously added CDNF protects the heart against the injuries induced by I/R or TG and this protection is abrogated in the presence of wortmannin, a PI3K-specific inhibitor, or by KDEL-containing heptapeptides, suggesting that the PI3K/AKT pathway is involved in CDNF-induced cardioprotection and the KDEL-R is a receptor for CDNF in the cardiac context.

## Results

***Thapsigargin (TG) induces ER stress and increases CDNF secretion in neonatal ventricular cardiomyocytes and in human induced pluripotent stem cells differentiated into cardiomyocytes (hiPSC-dCM)***

Human iPSC-dCM cells were produced as described previously (Lian et al., 2013) and their differentiation was confirmed by expression of troponin T (TnT). Approximately 61% of TnT-positive cells were observed in our differentiation protocol (not shown). As seen in **Figure 1**, in the absence of TG, CDNF was found mainly inside the cells (**panels A and C, controls**) and very little of this NF appeared in the cell media (**panels B and D, controls**). However, after 20h in the presence of TG, there was an increase in the amount of CDNF detected in the cell lysates (**panels A and C, TG**), and considerable amounts were also detected in the cell media (**panels B and D, TG**). As seen in **Figure 1E**, treatment with TG (1μmol/L/20h) significantly increased the expression of GRP78 to 1.7-fold when compared to controls, confirming that these cells were under ER/SR stress condition. Interestingly, when the cells were pre-treated with 1μmol/L exogenous CDNF (exoCDNF) for 15min before TG addition, there was no increase in GRP78 (**panel E**), a marker of ER stress, suggesting that exoCDNF is preventing TG-induced ER/SR stress. **Figure 1G** shows that isolated hearts subjected to I/R had their levels of CDNF increased to 27 times the control values, and this was accompanied by an increase in CHOP (CCAAT/enhancer-binding protein homologous protein), another ER/SR stress marker, to ~1.7-fold, suggesting that these hearts were under ER/SR stress. ExoCDNF added before I/R led to a significant decrease in CHOP levels by approximately 50% (**Figure 1F**).

Taken together these data suggest that TG and I/R, two ER/SR stressors, increase the concentration of CDNF, GRP78 and CHOP in hiPSC-dCM and neonatal mice cardiomyocytes as well as in the intact heart. Pre-treatment of the cells or the hearts with exoCDNF blocked the increase in the two UPR markers, GRP78 and CHOP, suggesting that CDNF is an anti-ER/SR stressor in the cardiac context. Interestingly, TG treatment, in addition to increasing the cellular levels of CDNF in mouse or human cardiomyocytes, also increases its secretion to the extracellular milieu, which is consistent with a protective activity of this NF.

### ***ExoCDNF prevents the Ca<sup>2+</sup>-transient depletion induced by thapsigargin***

As seen in **Figure 2**, TG treatment (1μmol/L/20h) reduced calcium transients of hiPSC-dCM (reduced spike amplitudes in **panel A**, quantified in **panel B**). However, pre-incubation of these cells with CDNF (1μmol/L/1h) upon TG addition potentiated the calcium transients to values even greater than the control, suggesting that exoCDNF exerts a direct effect on cardiomyocyte calcium homeostasis under stress conditions, probably by improving calcium uptake by the ER/SR, an outcome that may prevent cellular injuries provoked by

140 cytosolic calcium overload (**Figure 2**). The addition of wortmannin abrogates the effects of  
141 CDNF on calcium transients after TG addition (to be described later).

### 142 *Cardioprotective effects of exoCDNF on isolated hearts*

143 Initially, we evaluated whether rat heart chambers could express endogenous CDNF in  
144 significant amounts. As shown in **Figure 3** this does occur with the ventricles expressing  
145 greater amounts of CDNF per unit of total protein than the atria.

146 Next, the cardioprotective activity of CDNF was evaluated by perfusion with exoCDNF  
147 as a preconditioning treatment (**Figure 4 A and B**), and as a postconditioning treatment  
148 (**Figure 4 C and D**). Since there was no significant difference in the baseline of the left  
149 ventricular developed pressure (LVDP) among the groups (**Table 1**), all LVDP changes are  
150 expressed as percentage of the baseline values, which were taken as 100%. Under ischemic  
151 condition all control hearts exhibited a rapid reduction of LVDP down to zero, recovering  
152 poorly (~20%) during reperfusion (**panels A and C, circles**). Interestingly, preCDNF and  
153 postCDNF treatments enhanced these recoveries considerably, up to 70% and 50%,  
154 respectively (**panels A and C, squares**). Regarding left ventricular end-diastolic pressure  
155 (LVEDP; **panels B and D**), preCDNF kept the pressure low during perfusion (40 mmHg,  
156 **squares**) in relation to the control, which rose to ~70 mmHg at the end of the reperfusion  
157 process (**circles**). However, postCDNF treatment presented no significant alteration in LVEDP  
158 compared to control (**panel D**).

159 Myocardial infarct areas evaluated after 60 min of reperfusion were measured in  
160 control, preCDNF and postCDNF hearts (**Figure 4 E**). As seen, while in the control hearts the  
161 mean infarct area reached 42%, the hearts subjected to preCDNF or postCDNF treatments  
162 showed substantial reduction in the infarct area to 19% and 25%, respectively.

163 As shown in **Figure 4 (panels F-H)**, there was a significant reduction in the mean  
164 number of ventricular arrhythmias or non-sustained tachyarrhythmia events (**panel F**)  
165 produced during the 60 min of reperfusion in preCDNF and postCDNF protocols. The number  
166 of sustained ventricular tachyarrhythmias was not significantly reduced by preCDNF or  
167 postCDNF treatments (**panel H**), although the duration of these tachyarrhythmias was reduced  
168 from ~48 s to 33 and 25 s in preCDNF and postCDNF, respectively (**panel G**).

### 169 *PI3K/AKT pathway is mediating the cardioprotective effects of exoCDNF*

170 Next, we examined the signaling pathway involved in the cardioprotective effect  
171 conferred by exoCDNF. Surprisingly, only wortmannin was able to abrogate the

cardioprotective effect of exoCDNF treatment (**Figure 4, triangles**), while the other inhibitors AG490 (JAK-STAT3 inhibitor), rottlerin and chelerythrine (PKC inhibitors) failed as displayed in **Figure 5**. As seen in **Figure 4**, the massive recovery in LVDP (**panel A**) or the maintenance of the low values of LEVDP (**panel B**) observed with preCDNF treatment before I/R injury (**squares**) were completely abolished in the presence of wortmannin (**triangles**) and values were similar to those of the control groups (**circles**). Because only wortmannin abrogated CDNF-induced cardioprotection in preCDNF condition, only this inhibitor was evaluated in postCDNF treatment, and again wortmannin abrogated LVDP recovery (**Figure 4C**). The pre-treatment with wortmannin led to an increase of infarct area in preCDNF and postCDNF to ~40% and ~45%, respectively, similar to the control (**Figure 4E**). The lack of effect of the other inhibitors on infarct area are depicted in **Figure 5**. In addition, treatment with wortmannin in preCDNF and postCDNF protocols abolished the reduction of ventricular arrhythmias in hearts subjected to I/R (**Figure 4 F and G**). Besides, as shown before in **Figure 2**, addition of wortmannin also abrogates the protective effects of CDNF on calcium transients after TG addition.

The levels of phosphorylated AKT (p-Akt) were evaluated in hiPSC-dCM, mouse cardiomyocytes and isolated hearts before and after addition of exoCDNF (**Figure 6, panels A, B and C**, respectively). In all three models, the levels of p-Akt more than doubled after CDNF addition, except when CDNF was added after incubation with wortmannin.

#### ***exoCDNF exerts a protective effect on mitochondrial function after heart I/R***

Protection of mitochondrial function during I/R has been reported to be beneficial to cardiomyocytes (Heusch, 2015). In order to investigate whether CDNF could exert any effect on mitochondrial function and whether wortmannin could counteract these effects, mitochondria were isolated from hearts subjected to I/R in the Langendorff model with or without perfusion of CDNF (preCDNF or postCDNF) and CDNF+Wortmannin (**Figure 7**).

As expected, ADP-stimulated complex I respiration was reduced in the I/R group and this decrease was restored partially, but significantly, by pre or postCDNF treatments (1μmol/L); but the pre-treatment was more effective (**panel A**). Wortmannin abrogated the improvement conferred by preCDNF and postCDNF. The same scenario was found for ATP production (**panels C and D**) and mitochondrial swelling (**panels E and F**), indicating that the I/R-induced oxidative phosphorylation impairment and the increased mitochondrial volume were partially reversed by pre or postCDNF treatments, acting through the PI3K/AKT



204 pathway. Mitochondrial complex IV respiration and maximal oxygen uptake of uncoupled  
205 mitochondria were not different between groups, reflecting an equal loading of viable  
206 mitochondria (**panel B**). Mitochondrial transmembrane potential ( $\Delta\psi$ ) showed an increase due  
207 to I/R, reflecting the inner transmembrane depolarization. PreCDNF and postCDNF treatments  
208 ameliorated this dangerous  $\Delta\psi$  increase and wortmannin abrogated the beneficial effects of  
209 CDNF (**panels G and H, respectively**). Next, mitochondrial ROS production was measured  
210 and, as expected, I/R led to an enhancement in ROS levels, but pre or postCDNF treatments  
211 reduced ROS only when wortmannin was absent (**panels I and J, respectively**).

212 To test whether exoCDNF could exert a direct mitochondrial protection independent  
213 of PI3K/AKT activation, mitochondria from non-ischemic hearts were isolated and subjected  
214 to hypoxia/reoxygenation with or without previous incubation with CDNF. As shown in  
215 **Figure 8A**, the ADP-stimulated complex I respiration was reduced in hypoxia/reoxygenation  
216 group compared to control group, but in this case CDNF was ineffective in blocking or  
217 reversing this effect, confirming that intact cells are necessary for the beneficial effects of  
218 CDNF. Mitochondrial complex IV respiration and maximal oxygen uptake of uncoupled  
219 mitochondria were not different between groups, reflecting an equal loading of viable  
220 mitochondria (**Figure 8B**).

## 221 ***KDEL-R in the membrane binds CDNF and mediates its cardioprotective activity***

222 We postulated that KDEL-R, which has been found in the cell membrane (Henderson  
223 et al., 2013; Becker et al., 2016; Ruggiero et al., 2017) and has on its operator sequence an ER  
224 stress-responsive element (ERSE) (Mizobuchi et al., 2007; Oh-Hashi et al., 2013), might  
225 function as a CDNF receptor. To investigate this, we perfused hearts before CDNF treatment  
226 with two heptapeptides, which incorporate the last seven amino-acid residues of human  
227 (THPKTEL) and rat (TRPQTEL) CDNF. The rationale was to block CDNF's putative  
228 binding site on the KDEL-R, thus impairing CDNF function. As seen in **Figure 9**,  
229 (TRPQTEL, **panels A-C** and THPKTEL, **panels D-F**), both peptides were able to prevent  
230 the cardioprotection induced by preCDNF treatment, abolishing the beneficial recovery of  
231 LVDP (**panels A and D, diamonds**), the beneficial reduction of LVEDP (**panels B and E,**  
232 **diamonds**), and the decrease in infarct areas of the hearts (**panels C and F**) induced by  
233 CDNF. As seen in these panels, perfusion with the peptides alone was not able to confer  
234 cardioprotection (**triangles in all panels**), suggesting that the occupancy of the binding site on



the KDEL-R by a ligand is not enough for full activation of the downstream pathway and cardioprotection.

**Figure 10** shows that the peptide **DRATSAL** used as a scrambled peptide by (Henderson et al., 2013) was not able to abolish the protective effect of CDFN in I/R experiments. Interestingly, **THPKTEL** was able to abolish CDFN-induced p-AKT enhancement, an effect that was not observed with the scrambled peptide. This result reinforces the link between KDEL-R activation and the PI3K/AKT signaling pathway (**Figure 6D**).

Finally, **Figure 11** shows that pre-incubation of CDFN with the anti-CDFN antibody (0.5µg/ml perfused for 5 min prior to the I/R protocol) completely abrogates the cardioprotective role (**panel A**, LVDP; **panel B**, LVEDP, and **panel C**, infarct area), probably because this antibody recognizes the C-terminal sequence of CDFN and prevents its binding to the KDEL-R.

## Discussion

Cardiomyokines are proteins secreted by a healthy or a diseased heart displaying a beneficial autocrine/paracrine function (Glembotski et al., 2011; Doroudgar and Glembotski, 2011; Maciel et al., 2017). The present study is the first to characterize CDFN as an effective cardiomyokine that protects whole hearts, mice and especially human cardiomyocytes (iPS derived) in culture against injuries provoked by calcium overload, specifically, in our study, I/R and TG. As shown by others, MANF has cardioprotective activity (Tadimalla et al., 2008; Glembotski et al., 2012) and here we have extended this concept to CDFN, conferring on this member of this unusual family of neurotrophic factors a cardioprotective activity as well. Thus, CDFN and MANF can be considered as neuro/cardiokines and it is possible that other beneficial effects will be described in the near future for this interesting family of proteins. In fact, it has been shown that MANF and CDFN are also important regulators of inflammation and tissue repair (Neves et al., 2016; Sousa-Victor et al., 2018). The exacerbated production of pro-inflammatory mediators is well known for the deleterious effects, leading to chronic tissue injury (Nishida et al., 2017; Sousa-Victor et al., 2018).

What is the commonality of all these actions of CDFN and MANF? All the processes in which CDFN and MANF are involved, including neuro and cardioprotection, modulation of

265 inflammation, homeostasis of pancreatic  $\beta$ -cells (Hummasti et al., 2010; Lindahl et al., 2014),  
 266 among others, have ER-stress as their underlying cause. Interestingly, both proteins are ER-  
 267 resident proteins, but differently from other ER/SR-resident stress-related proteins, their  
 268 expression is enhanced upon ER/SR-induced stress, and more importantly they are secreted to  
 269 the extracellular milieu to exert beneficial functions in neighboring cells. Thus, this new  
 270 family of neuro/cardiogenic factors has an intracellular activity, not yet completely  
 271 understood, as well as extracellular functions that endow this new group of proteins with  
 272 potential applications in medicine.

273 It has been shown that MANF expression and secretion also increase when rat  
 274 cardiomyocytes (and HeLa cells) are treated with TG, but not with tunicamycin or DTT, other  
 275 ER/SR-stressors that do not alter calcium homeostasis, leading to the proposition that MANF  
 276 is retained in the ER/SR through a calcium-dependent mechanism, which relies on GRP78  
 277 forming a complex with MANF only in the presence of this ion (Glembotski et al., 2012).  
 278 Once calcium concentration in the ER/SR is decreased (under stress conditions), the complex  
 279 could dissociate leading to MANF secretion allowing its action as a cardiomyokine. Although  
 280 MANF has a KDEL-like sequence (RTDL) in its C-terminal end, this degenerated sequence  
 281 has a decreased affinity for the KDEL-R (Glembotski et al., 2012; Henderson et al., 2013)  
 282 favoring its unbinding and secretion. The data presented here suggest that a similar mechanism  
 283 of secretion might operate for CDFN in cardiomyocytes, although we did not investigate this  
 284 deeply. Our main focus here was to discover how CDFN exerts its paracrine/autocrine  
 285 functions in the cardiac context once the protein is secreted in response to an ER/SR insult.

286 Our data showed that heart hemodynamic function was significantly preserved upon  
 287 CDFN treatment under pre- or post-conditioning regimens. We also showed that ventricular  
 288 arrhythmias were significantly reduced by CDFN, as was infarct area (**Figure 4**). Interestingly,  
 289 all these cardioprotective effects conferred by CDFN were abrogated when its interaction with  
 290 the KDEL-R was blocked (**Figures 9 and 11**). We thus were able to identify the KDEL-R as a  
 291 putative receptor for this neuro/cardiokine family of proteins, and PI3K/AKT as the signaling  
 292 pathway that is activated upon receptor binding, at least for CDFN in the heart (**Figures 2, 4, 6**  
 293 **and 7**).

294 The KDEL receptor is a seven-transmembrane-domain protein whose function is to  
 295 sort and retrieve proteins bearing a KDEL sequence (calnexin, GRP78, PDI, for instance) and  
 296 possibly proteins with KDEL-like sequences (Erp72, MANF and CDFN) from the Golgi  
 297 complex to the ER/SR (Dorner et al., 1990; Voutilainen et al., 2015; Becker et al., 2016). The

importance of KDEL-R to cardiomyocyte homeostasis was demonstrated by studying transgenic mice that express a mutant KDEL-R in which reverse transport from Golgi to ER/SR was compromised. These animals die after birth with cardiac hypertrophy (Hamada et al., 2004). Recent studies, however, have suggested that the KDEL-R has additional functions and new cellular localizations, including the plasma membrane. In this regard, there is mounting evidence for the presence of KDEL-R at the surface of mammalian cells, where the receptor binds cargo proteins such as A/B microbial toxins K28, MANF and other proteins in which a KDEL-sequence is present at the C-terminus (Riffer et al., 2002; Henderson et al., 2013; Becker et al., 2016; Trychta et al., 2018). Trychta and collaborators (2018) have coined the term “ER exodosi” in an elegant study where they showed a massive departure of proteins containing KDEL-related sequences upon calcium-induced ER-stress in several mammalian cell lines. Even beneficial chaperones were among the proteins that were released.

The importance of the KDEL-R for MANF trafficking has been investigated in SH-SY5Y cells by using cells expressing different MANF constructs (with or without the RTDL sequence) in combination with different isoforms of the KDEL-R (KDEL-R1, 2 and 3) (Henderson et al., 2013). Interestingly, that study showed consistently that removal of the C-terminal RTDL sequence of MANF increased its secretion, reinforcing the idea that KDEL-R is an important partner of MANF in ER, although other studies questioned this interpretation (Norisada et al., 2016). Besides, the study conducted by Henderson and collaborators (Henderson et al., 2013) detected the presence of FLAG-tagged KDEL-R at the cell surface under ER-stress, and MANF binding to the cell surface required the RTDL sequence. This study unequivocally showed that KDEL-R located at the cell membrane modulates the binding of extracellular MANF, leading to the conclusion, as posed here, that the KDEL-R is the putative receptor for this family of NFs. Unfortunately, that study did not relate MANF-induced cardioprotection with its binding to cell membrane KDEL-R, a relation that we have shown here for CDNF, since the blockade of KDEL-R by peptides or the occlusion of KTEL sequence of CDNF by the antibody anti-CDNF abrogated the beneficial effects of CDNF on hearts and cardiomyocytes (**Figures 9 and 11**). Thus, the second novelty of the present study was to show that CDNF exerts its cardioprotective activity through binding to the KDEL-R that resides at the cell membrane, whose concentration increases upon ER/SR-stress (Becker et al., 2016). It is also important to note that the interaction with KDEL-R is pH dependent, being stronger at acidic pH (Wilson et al., 1993). Acidification occurs in ischemia, supporting the

330 notion that MANF or CDNF interaction with KDEL-R at the cell membrane might be even  
331 stronger under ischemia.

332 For MANF, a recent study identified that the sulfoglycolipid sulfatide present in the  
333 outer cell-membrane leaflet plays a fundamental role in MANF internalization and  
334 cytoprotection in *C. elegans* and mammalian cells (Bai et al., 2018). CDNF did not require  
335 this sulfatide for its cellular internalization, but CDNF was not deeply explored in that study.  
336 Indeed, the N-domain of MANF and CDNF has a saposin-like fold, suggesting its direct  
337 interaction with membrane lipids without the necessity of a receptor. Our data, however,  
338 identified KDEL-R as a putative receptor for CDNF in the heart. How can we reconcile these  
339 observations? Calcium-induced ER/SR-stress increases the secretion of MANF and CDNF  
340 (and also other ER/SR-resident proteins), [Figure 1 and (Bai et al., 2018)] to the extracellular  
341 milieu. ER-stress also enhances the expression of KDEL-R through the action of the  
342 transcription factor XBP1 (Trychta et al., 2018), increasing the presence of KDEL-R at the  
343 cell membrane (Henderson et al., 2013). Outside the cells, MANF and CDNF would establish  
344 an initial “unspecific” contact (mediated by sulfatide in the case of MANF) with the lipid  
345 bilayer through its N-domain and a further specific interaction with newly arrived KDEL-R  
346 through its C-terminal domain. Currently, we do not know whether the KDEL-R bound to  
347 CDNF is internalized and if so, what would be their fate. However, as presented here,  
348 CDNF/KDEL-R activates PI3K/AKT signaling. We do not know what is(are) the connector(s)  
349 between CDNF/KDEL-R and PI3K/AKT signaling, but we do know that the increase in p-  
350 AKT that takes place in hearts upon CDNF treatment is abrogated by THPKTEL, a peptide  
351 that binds to the KDEL-R at the cell membrane, but not by DRATSAL, a scrambled,  
352 ineffective peptide (Figure 6D and Figure 10).

353 There are several reports in the literature showing signaling pathways controlled by  
354 KDEL-R mainly in cancer or neuronal cells. Interestingly, GRP78, which is present at the cell  
355 membrane in several cancer cells, co-localizes with both subunits of PI3K, namely p85 and  
356 p110, as well as with PIP3 controlling PI3K/AKT pathway either directly or indirectly (Zhang  
357 et al., 2013). We are currently conducting additional experiments to dissect these missing  
358 connections.

359 Cardiac ischemia induces calcium transient depletion resulting in the halting of the  
360 contractile machinery and cell injury (Heusch, 2015). Immediate restoration of blood flow  
361 (reperfusion) is essential for myocardial survival, however, paradoxically, reperfusion itself

can induces injury mediated by ER/SR stress, cytosolic calcium overload and mitochondrial impairment (Heusch, 2015). We have shown that CDFN prevents ER/SR-stress, by recovering calcium transient from cardiomyocytes. This effect would reduce calcium overload and prevent mitochondrial lesions and cell death (Heusch, 2015). Additionally, the treatment with CDFN prevents lesions by I/R. Similar results were observed with MANF (Glembotski et al., 2012), showing infarct size reduction in mice hearts. Indeed, CDFN reduces cerebral ischemic lesions by ER/SR-stress prevention (Zhang et al., 2018). Curiously, in our study, CDFN was able to prevent myocardial injury, not only in pre-ischemic treatment, but also in post-ischemic treatment. Since CDFN reduced reversible and irreversible I/R injuries, it could be a potential treatment against revascularization lesions. However, despite experimental studies having shown that interventions during myocardial reperfusion can reduce myocardial infarct size by up to 50%, clinical studies that use these strategies have not been successful (Yellon and Hausenloy, 2007). Thus, there is a necessity to develop new therapies against I/R injury. The Reperfusion Injury Salvage Kinase (RISK) pathway has emerged as a new target for preventing lethal reperfusion injury. There is a consensus, that the RISK pathway mediates the programmed cell survival, as well as an extensive preclinical evidence that activation of this pathway by pharmacological agents reduces the size of myocardial infarction by up to 50% (Hausenloy and Yellon, 2004). Cardioprotection by RISK pathway has been attributed to the activation of PI3K/AKT signaling pathway inducing inhibition of mitochondrial mPTP opening, sarcoplasmic reticulum  $Ca^{2+}$  uptake improvement, and antiapoptotic pathway activation (Yellon and Hausenloy, 2007; Heusch, 2015). These kinases are activated during myocardial reperfusion and confer cardioprotection avoiding lethal reperfusion injury (Hausenloy and Yellon, 2004). As shown in the present study, wortmannin, was the only tested inhibitor that was able to abrogate all the beneficial effects of CDFN. Altogether, these data unequivocally point to PI3K/AKT signaling as responsible for the cardiomyokine activity of CDFN. This was confirmed by increased levels of p-AKT after exogenous CDFN and return to basal levels in the presence of CDFN plus wortmannin. Interestingly, THPKTEL also reversed the increase in p-AKT levels induced by CDFN, connecting the binding of CDFN to the KDELR to PI3K/AKT activation.

In conclusion, the present study characterizes CDFN as new cardiomyokine acting at the cell membrane through its putative receptor KDELR and activating PI3K/AKT to exert its cardioprotective activity. All these findings are summarized as a model in **Figure 12**.

## 395 ***Materials and Methods***

396 All solutions were freshly prepared using MilliQ® Water or high quality analytical  
397 grade organic solvents. All solutions were filtered before the use. The chemicals were obtained  
398 from Sigma-Aldrich (St. Louis, MO, USA) or purchased from vendors as indicated.

## 399 ***CDNF production and purification***

400 The plasmid pET-25b(+) containing a synthetic CDFN cDNA was transformed into  
401 Escherichia coli strain Rosetta Gami B (DE3) (Stratagene, San Diego, California, USA). Cell  
402 cultures were grown at 37°C and induced with 1mmol/L IPTG for 2h. The cells were  
403 harvested by centrifugation, resuspended in extraction buffer (20mmol/L MES at pH 6.0,  
404 Complete, EDTA-free Tabs—Roche, Basel, Switzerland) and lysed by sonication at 4°C.  
405 After centrifugation, the fraction containing the soluble proteins was loaded onto a 5mL Hitrap  
406 SP XL column (GE Healthcare, Chicago, Illinois, USA) equilibrated with 20mmol/L MES at  
407 pH 6.0. The bound material was eluted with a linear gradient of NaCl (0–1mmol/L) at  
408 67mmol/L per min. Fractions containing the protein as checked by monitoring absorption at  
409 280nm and denaturing polyacrylamide gel electrophoresis were loaded onto a Superdex 75  
410 column (16 9 100 mm—GE Healthcare) equilibrated with 20mmol/L MES at pH 6.0 and  
411 150mmol/L NaCl (see Latge et al., 2015 for more details).

## 412 ***Animals***

413 Adult male Wistar rats (300-350 g) and neonatal CD-1 mice (1-3 days old) were used  
414 following the Guide for the Care and Use of Laboratory Animals published by the US  
415 National Institutes of Health (8th edition, 2011) and the local Institutional Animal Care and  
416 Use Committee (100/16 and 015/17).

## 417 ***Differentiation of human induced pluripotent stem cells into cardiomyocytes***

418 Human induced pluripotent stem cells (hiPSCs) were differentiated into cardiac  
419 lineage following 30 days of induction as previously described (Lian et al., 2013). Briefly,  
420  $3 \times 10^5$  hiPSCs were plated on 48 plate dish treated with 1% of Matrigel® hESC-Qualified  
421 Matrix (Corning™, New York, USA) and cultivated on 2mTeSR™1 (STEMCELL  
422 Technologies, Vancouver, Canada) for 3 days. On day 0, the cells were cultivated in RPMI  
423 1640 (Gibco™, Thermo Fisher, Waltham, Massachusetts, USA) supplemented with B-27™  
424 (1640 (Gibco™) Supplement, without insulin (Gibco™) (RB-) and 9 µmol/L of CHIR 99021  
425 (R&D SYSTEMS, Minneapolis, Minnesota, USA). After 24h, the cells were cultivated with  
426 RB- for the next 2 days and on day 3 and 4, the WNT signaling was inhibited with 10 and 5



427  $\mu$ M of XAV939 (R&D SYSTEMS), respectively. On day 7, we observed the first beating  
428 areas and the cells were then cultivated in RPMI 1640 (Gibco™) supplemented with B-27™  
429 Supplement (Gibco™) (RB+) until day 30<sup>th</sup>. These cells were called hiPSC-dCM (Human  
430 induced pluripotent stem cells differentiated into cardiomyocytes).

431 For efficiency evaluation of cardiomyocyte differentiation, after day 30, the hiPSC-  
432 dCM was dissociated using Tryple 1x (Gibco™) until the cells detached from the culture  
433 plate. Then the cells were centrifuged at 300g/5min. The cells were fixed with formaldehyde 4  
434 % for 20 min at room temperature, permeabilized with PBS Triton 0.3 % for 30 min and  
435 stained with Troponin T (1:200) (Thermo Fisher) for 30 min AT 4°C. Afterwards the cells  
436 were stained with Alexa Fluor 647 goat anti mouse IgG (1:1,000) secondary antibody (Thermo  
437 Fisher) for 30 min at 4°C. The cells stained only with secondary antibody were used as  
438 fluorescence negative control. The data was acquired by BD Accuri™ C6 (BD Biosciences,  
439 San Jose, CA, USA) and analyzed with the FlowJo v10.1 software (FlowJo, USA).

#### 440 ***Isolation and culture of mice cardiomyocytes***

441 The cardiomyocytes were isolated from hearts of neonatal mice (CD1-black) 1-3 days  
442 after birth. Briefly, the hearts were dissected out, placed in PBS and washed. The heart tissue  
443 was minced and digested in a dissociation solution (In mol/L: NaCl, 136.7; KCl, 2.68;  
444 Na<sub>2</sub>HPO<sub>4</sub>, 0.352; NaHCO<sub>3</sub>, 11.9; dextrose, 11) containing pancreatin (1.25mg/ml; Sigma-  
445 Aldrich) and bovine serum albumin (BSA; 3 mg/mL; Sigma-Aldrich) for 5 min at 37°C with  
446 gentle stirring. The supernatant fraction containing cells from each digestion was collected in a  
447 conical tube, suspended in growth medium containing 15% fetal bovine serum for inhibition  
448 of proteolytic enzymes and spun at 300 g/5 min. Elimination of non-muscle cells was achieved  
449 by pre-plating for 1h. After that, the cells were counted and seeded in 6-well plates at a density  
450 of 10<sup>5</sup> cells/well and cultured in DMEM-high glucose containing 10% FBS at 37°C and 5 %  
451 CO<sub>2</sub>. Experimental in-vitro conditions were established 3 days after plating (Bagno et al.,  
452 2016).

#### 453 ***Immunocytochemistry imaging and quantification of fluorescence intensity***

454 Cells were fixed with 4% paraformaldehyde for 10 min at room temperature. Then,  
455 cells were permeabilized in 0.3% triton X-100 in PBS and incubated with blocking solution  
456 (5% BSA, in PBS pH 7.4) for 1h. After incubation with appropriate primary (1:500),  
457 secondary antibodies (1:500) and Hoechst (1:5,000) cover slips were mounted with prolong.  
458 Images were acquired with an Olympus DS-Fi2 confocal microscope equipped with 63x oil  
459 immersion objective and with a Nikon DS-fi2 camera operated with the standard QC capture



software (Leica). Quantification was performed with ImageJ software (NIH, Baltimore, MD) using the corrected total cell fluorescence (CTCF) method.

#### ***Obtention of media and cell sample extracts***

Cell media without fetal bovine serum were collected, appropriately concentrated, boiled and combined with the Laemmli sample buffer before SDS-PAGE and Western blot. The cells lysates were obtained by extracting cells in a minimal volume of cell lysis buffer composed of RIPA buffer (Sigma-Aldrich), EDTA 50 mmol/L (pH 8.0), sodium fluoride 5 mmol/L, 10% SDS, protease inhibitor mixture (Roche), phosphatase inhibitor mixture 1 (Sigma Aldrich) phosphatase inhibitor mixture (Sigma Aldrich). Samples of the media samples (150 µg) and cell extracts (50 µg) were analysed by SDS-PAGE, followed by Western blot.

#### ***[Ca<sup>2+</sup>] Measurements***

Human iPSC-dCM were plated on glass coverslips for 5 days and loaded with 5 µmol/L Fura-2AM at 37 °C in complete culture medium containing 2.5 mmol/L probenecid for 40-60 min before the intracellular calcium measurements. The cells were then accommodated in a chamber whose base was formed by the coverslip containing the cells that were maintained at 37 °C in the complete medium (volume of the incubation chamber – 500 µL). Cytoplasmic calcium concentrations of groups of hiPSC-dCM (20–30 cells) were measured on a fluorescence imaging spectrofluorimeter (Easy Ratio Pro equipped with a DeltaRAMX Illuminator, an Olympus IX71 microscope, a QuantEM 5125C camera and the Image-Pro Plus v 6.3 software; PTI Photon Technology International, Princeton, NJ). Fura-2 was excited alternately at 340 nm and 380 nm, and the emission was collected at 510 nm. The ratio measurement, which is proportional to the cytoplasmic calcium concentration, was determined every 100 ms for at least 5 min. Free intracellular Ca<sup>2+</sup> concentration [Ca<sup>2+</sup>]<sub>i</sub> was monitored in arbitrary units as the F340/380 nm ratio. The amplitude of variations in [Ca<sup>2+</sup>]<sub>i</sub> (Δ F340/F380) for cells without treatment and with treatment were obtained for 5 different intervals of 5-10 seconds from ratio measurements.

#### ***Treatments applied to hiPSC-dCM and mouse cardiomyocytes before Western blot and calcium measurements:***

**Conditions/Groups:** **Control**: mouse cardiomyocytes or hiPSC-dCM cultures received no treatment before calcium measurement or Western blot analysis; **Thapsigargin (TG)**: mouse cardiomyocytes or hiPSC-dCM cultures were incubated with TG (1 µmol/L)

during 20 h before calcium measurements or Western blot analyses; **CDNF**: mouse cardiomyocytes or hiPSC-dCM cultures were incubated with CDFN (1  $\mu$ mol/L) during 20h before calcium measurements or Western blot analyses. **TG+CDNF**: hiPSC-dCM cultures were incubated with CDFN (1  $\mu$ mol/L) one hour before the TG (1  $\mu$ mol/L). The calcium measurements or Western blot analyses were performed after 20 h of incubation with TG. **TG+CDNF+Wortmannin**: hiPSC-dCM cultures were incubated first with wortmannin (0.3  $\mu$ mol/L) for 15 min, then with CDFN (1  $\mu$ mol/L for 1 h) and finally with TG (1  $\mu$ mol/L). The calcium measurements were performed after 20h of incubation with TG. **CDNF+Wortmannin**: mouse cardiomyocytes or hiPSC-dCM cultures were incubated first with wortmannin (0.3  $\mu$ mol/L) for 15min, then with CDFN (1 $\mu$ mol/L) for 1 h. The Western blot analyses were performed after 20 h of incubation. **Wortmannin**: hiPSC-dCM cultures were incubated with wortmannin (0.3  $\mu$ mol/L) for 20h before the calcium measurements. The media was not changed after each substance addition in each group. The calcium measurements and/or Western blot analyses were performed after 20h of incubation in all groups.

#### 507 *Langendorff experimental protocols and I/R*

508 The I/R experiments were performed on isolated rat hearts as described previously  
509 (Maciel et al., 2017). The hearts were rapidly removed and cannulated through the aorta in a  
510 modified Langendorff apparatus and perfused at constant flow of 10 mL/min with Krebs-  
511 Henseleit buffer (KHB) solution: in mmol/L - NaCl 118; NaHCO<sub>3</sub> 25; KCl 4.7; KH<sub>2</sub>PO<sub>4</sub> 1.2;  
512 MgSO<sub>4</sub> 1.2; CaCl<sub>2</sub> 1.25, and glucose 11, at 37°C and equilibrated with a gas mixture of 95%  
513 O<sub>2</sub> and 5% CO<sub>2</sub> (pH 7.4). The perfusion temperature was held constant by a heat exchanger  
514 located next to the aortic cannula. A fluid-filled latex balloon was inserted through the left  
515 atrium into the left ventricle and connected to a pressure transducer and the PowerLab System  
516 (AD Instruments, Australia) for continuous left ventricular pressure recording. The left  
517 ventricular end-diastolic pressure (LVEDP) was set to 10mmHg by balloon inflation; during  
518 the experiment, the hearts were continuously immersed in 37°C warm buffer to avoid  
519 hypothermia. Hearts were allowed to stabilize for 20 min before a protocol was started. All  
520 hearts were submitted to 30min of basal recordings. The ischemia protocol was induced by full  
521 stop of retrograde perfusion during 30min. The reperfusion was performed by full re-  
522 establishment of retrograde perfusion during 10min for mitochondria analysis or 60min for  
523 infarct size measurements. *Langendorff experimental protocols*: **Conditions/Groups**: **No-I/R**:  
524 Hearts were perfused with KHB solution for 90min (only for mitochondria isolation); **I/R**:

Global ischemia was induced for 30min by complete perfusion arrest followed by 10 or 60 min of reperfusion with KHB solution; **CDNF-preconditioning**: The hearts were perfused with the KHB containing CDNF (1  $\mu\text{mol/L}$ ) for 5min before 30min of global ischemia followed by 10 or 60 min of reperfusion with KHB. In the groups with antagonist, the substances were perfused for 5min before CDNF and along with CDNF (1  $\mu\text{mol/L}$ ) for 5min.; **CDNF-postconditioning**: Global ischemia was induced for 30 min by full stop of retrograde perfusion followed by the perfusion with KHB plus CDNF (1  $\mu\text{mol/L}$ ) during the first 5 min, followed by 5 or 55 min of reperfusion with KHB without CDNF. The antagonists used in the present study were: Wortmannin 0.3  $\mu\text{mol/L}$  (PI3K-AKT inhibitor), Chelerythrine 10  $\mu\text{mol/L}$  and Rottlerin 10  $\mu\text{mol/L}$  (PKC inhibitors), and AG490 10  $\mu\text{mol/L}$  (JAK-STAT3 inhibitor). The samples of isolated hearts were collected after 60min of reperfusion for Western-blot analyzes.

#### ***Left ventricular developed pressure (LVDP), left ventricular end-diastolic pressure (LVEDP) and infarcted area measurements***

LVDP and LVEDP were analysed at different time points during the experiments, namely, at baseline, every 5 min during ischemia, and every 5min during reperfusion until 60min of reperfusion. For this, the mean value of a 30 sec recording at the respective time point was taken. After 60 min reperfusion period, the hearts were sliced into 1.5 mm cross-sections from apex to base and incubated in 1% triphenyl tetrazolium chloride (TTC) for 4 min at 37 °C, followed by incubation in a 10% (v/v) formaldehyde solution for 24h to improve the contrast between the stained (viable) and unstained (necrotic) tissues. The infarct area was determined by planimetry using ImageJ software (version 1.22, National Institute of Health, USA). Infarct size was expressed as a percentage of the area at risk (total).

#### ***ECG recordings in isolated hearts***

Three silver-silver chloride electrodes were used to obtain electrocardiographic recordings. Two electrodes were connected to the differential input of a high-gain amplifier (BioAmp; AD Instruments) positioned close to the left ventricle and right atrium. The third electrode was grounded. The electrocardiograms were recorded with PowerLab/400 and Chart 4.0 software (AD Instruments).

#### ***Peptides used in I/R experiments***

The peptide sequences corresponding to the last 7 amino-acid residues of the C-terminal region from human (THPKTEL) and rat (TRPQTEL) CDNF or a scrambled peptide

DRATSAL (Henderson et al., 2013) were synthesized by GenOne Biotechnologies with 98% purity. In the experiments where the peptides were tested separately, each peptide at 2  $\mu\text{mol/L}$  was perfused during 5 min before I/R. When the peptides were tested in combination with CDNF, they were first perfused alone (2  $\mu\text{mol/L}$ ) and then together with CDNF (1  $\mu\text{mol/L}$ ) for 5 min before I/R

#### ***Antibody used in I/R experiments***

To reinforce the evidence that the KDEL receptor is involved in the protection induced by CDNF, 5  $\mu\text{g/ml}$  of the antibody (Sigma Aldrich, St. Louis, MO) against peptides from the C-terminal domain of human CDNF were incubated with CDNF 1  $\mu\text{mol/L}$  during 1 h before the experiment. After 1h of incubation, CDNF (1  $\mu\text{mol/L}$ ) plus the antibody (5 $\mu\text{g/ml}$ ) were perfused for 5 min before the ischemia and reperfusion protocol.

#### ***Western blots***

SDS-PAGE gels were transferred to PVDF membranes. The membranes were probed with the following antibodies: CDNF (Sigma Aldrich; 1:1,000), GAPDH (Santa Cruz Biotechnology; 1: 10,000, Santa Cruz, CA, USA), GRP78 (Santa Cruz Biotechnology; 1:1,000), CHOP (Santa Cruz Biotechnology; 1:500), p-AKT (Cell Signalling; 1:750, Danvers, MA, USA), total AKT (Cell Signalling; 1:750), GRP78 (Sigma Aldrich; 1:1,000).

#### ***Mitochondria isolation and measurements of mitochondrial function***

Mitochondria isolation was performed according to (Gedik et al., 2017). After 10 min of reperfusion, the isolated hearts were rapidly removed, placed in ice-cold isolation buffer containing, in mmol/L: 250 sucrose, 10 HEPES, 1 ethylene glycol tetra acetic acid (EGTA), pH 7.4 with 0.5% w/v bovine serum albumin (BSA), minced thoroughly using scissors, and then homogenized with a tissue homogenizer (Ultra-Turrax) using two 10 sec treatments at a shaft rotation rate of 6,500 rpm to release subsarcolemmal mitochondria. This homogenate was further homogenized with proteinase type XXIV (8 IU/mg tissue weight, Sigma Aldrich) using a Teflon pestle for the release of the interfibrillar mitochondria from the tissue. The homogenate was centrifuged at 700g for 10 min at 4°C. The supernatant was collected and centrifuged at 12,000g for 10min. The resulting pellet was resuspended in isolation buffer without BSA and centrifuged at 10,000 g for min at 4°C. This procedure was repeated, and the pellet was resuspended in isolation buffer. The protein concentration of the isolated pellet was determined using a protein assay (Lowry method, Biorad, Hercules, CA, USA) by comparison to a BSA standard (Thermo Scientific, Waltham, MA, USA).

## 589 ***Mitochondrial oxygen consumption measurements***

590 Mitochondrial respiration was measured with a Clark-type electrode (Strathkelvin,  
591 Glasgow, UK) at 37°C during magnetic stirring in incubation buffer containing, in mmol/L:  
592 125 KCl; 10 MOPS; 2 MgCl<sub>2</sub>; 5 KH<sub>2</sub>PO<sub>4</sub>; 0.2 EGTA with 5 pyruvate and 5 malate, as  
593 substrates for complex I. The oxygen electrode was calibrated using a solubility coefficient of  
594 217 nmol O<sub>2</sub>/mL at 37°C. For the measurement of complex I respiration, mitochondria  
595 (corresponding to a mitochondrial protein amount of 100µg) were added to 1 mL incubation  
596 buffer. After 2 min of incubation, 1 mmol/L ADP was added and ADP-stimulated respiration  
597 measured over 2-3 min. Complex IV respiration was stimulated by adding N,N,N,N'-  
598 tetramethyl-p-phenylenediamine (TMPD, 300 µmol/L, Sigma Aldrich) plus ascorbate 3  
599 µmol/L (Sigma Aldrich). Maximal uncoupled oxygen uptake was measured in the presence of  
600 30 nmol/L carbonyl cyanide-p-trifluoromethoxyphenyl-hydrazone (FCCP, Sigma Aldrich)  
601 (Gedik et al., 2017).

## 602 ***Mitochondrial oxygen consumption under simulated Hypoxia/Reoxygenation***

603 To evaluate the direct effect of CDNF on isolated mitochondria, we measure the ADP-  
604 stimulated respiration after simulated hypoxia/reoxygenation with isolated mitochondria. The  
605 buffer (without pyruvate and malate) was made hypoxic by the introduction of purified  
606 nitrogen until the oxygen concentration was <15 nmol O<sub>2</sub> mL<sup>-1</sup>. Mitochondria (200µg protein)  
607 were added to 0.5 mL hypoxic buffer without or supplemented with 1µmol/L CDNF. After 8  
608 min, air-saturated incubation buffer (0.5 mL), again supplemented or not with 1µmol/L  
609 CDNF, was added to achieve re-oxygenation for 2 min. After simulated  
610 hypoxia/reoxygenation or in the respective normoxic time control (10 min), pyruvate  
611 (5mmol/L) and malate (5mmol/L) were given as substrates for complex I; mitochondria were  
612 stimulated with ADP and respiration was measured over 2min. Complex IV respiration was  
613 stimulated by adding N,N,N,N'-tetramethyl-p-phenylenediamine (TMPD, 300µmol/L) plus  
614 ascorbate (3µmol/L). Maximal uncoupled oxygen uptake was measured in the presence of  
615 30nmol/L carbonyl cyanide-p-trifluoromethoxyphenyl-hydrazone (FCCP) (Kleinbongard et  
616 al., 2015; Gedik et al., 2017).

## 617 ***Mitochondrial ATP production measurements***

618 After measurement of ADP-stimulated respiration, the incubation buffer containing  
619 mitochondria was taken from the respiration chamber and immediately supplemented with  
620 ATP assay mix (diluted 1:5, Sigma Aldrich)). Mitochondrial ATP production after each

621 respiration measurement was determined immediately and compared with ATP standards  
622 using a 96-well white plate and a spectrofluorometer SpectraMax® M3 (Molecular Devices  
623 California, EUA) at 560 nm emission (Gedik et al., 2017).

#### 624 ***Mitochondrial swelling and transmembrane potential measurements***

625 The mitochondrial swelling and mitochondrial transmembrane potential were  
626 evaluated using a high resolution spectrofluorometer SpectraMax® M3 (Molecular Devices  
627 California, EUA). The integrity of the mitochondrial membrane was assessed by varying the  
628 osmotic volumes of the mitochondria by spectrophotometric determination of the apparent  
629 absorption of the suspension at 540 nm. A mitochondrial suspension (100 µg/mL) was added  
630 to the breathing medium in the absence of respiratory substrates at 37 ° C and under constant  
631 stirring. The mitochondrial turgor was stimulated with 100 nmol/L of calcium. The swelling  
632 was expressed as a percentage of the absorption of the solution containing mitochondria in the  
633 presence of Cyclosporin A (0% swelling), in relation to the light emitted after the addition of  
634 FCCP 1µmol/L (100% swelling). For mitochondrial transmembrane potential ( $\Delta\psi$ )  
635 determination, the probe TMRM (tetramethylrhodamine methyl ester, 400 nmol/L) was added  
636 to the incubator solution containing 100 µg/ml of mitochondria for 1h. The  $\Delta\psi$  was estimated  
637 by the fluorescence emitted by TMRM under excitation of 580 nm. The  $\Delta\psi$  was expressed as  
638 the percentage of fluorescence emitted by TMRM when mitochondria were incubated in the  
639 presence of cyclosporin A (0%  $\Delta\psi$ ), relative to the fluorescence emitted after addition of  
640 FCCP to fully depolarized mitochondria (100%  $\Delta\psi$ ).

#### 641 ***Extramitochondrial ROS concentration measurements***

642 The Amplex Red Hydrogen Peroxide Assay (Life Technologies, Carlsbad, CA, USA)  
643 was used to determine extramitochondrial ROS concentration. Amplex Red reacts in 1:1  
644 stoichiometry with peroxide in the presence of horseradish peroxidase (HRP) and produces  
645 highly fluorescent resorufin. The incubation buffer containing mitochondria was removed  
646 from the respiration chamber, and immediately supplemented with 50 µmol/L Amplex  
647 UltraRed and U/mL HRP. The supernatant was collected after 120 min of incubation in the  
648 dark. Extramitochondrial ROS concentration was determined and compared with H<sub>2</sub>O<sub>2</sub>  
649 standards using a 96-well black plate and a spectrofluorometer SpectraMax® M3 (Molecular  
650 Devices California, EUA) at 540 nm emission and 580 nm extinction wavelengths (Gedik et al.,  
651 2017).

#### 652 ***Statistics***



653 Data are presented as mean  $\pm$  standard error of the mean (S.E.M). The data were  
654 analysed by one-way ANOVA. When a significant difference was detected, one-way ANOVA  
655 was followed by Bonferroni post-hoc tests (GraphPad Prisma 6.0 software, San Diego,  
656 California, USA).

## 657 **Acknowledgements**

658 This work was supported by Fundação Carlos Chagas Filho de Amparo à Pesquisa do  
659 Estado do Rio de Janeiro (FAPERJ) [E-26/010.003018/2014 and E-26/202.947/2017];  
660 Coordenação de Aperfeiçoamento de Pessoal de Nível Superior (CAPES) [fellowships to the  
661 students]; and Conselho Nacional de Desenvolvimento Científico e Tecnológico (CNPq)  
662 [402967/2016-0]. We are grateful to Martha M. Sorenson for her suggestions and careful  
663 reading of the manuscript and Dr Diana Pellizari, Santiago Alonso and Elisabeth M. Duarte  
664 for lab technical assistance.

665

666 **Competing interests:** All the authors declare no competing financial interests.

## 667 **Contributions**

668 L.M., D.F.O, A.C.C.C., J.H.M.N. F.L.P, and D.F. Conception and design, Acquisition of data,  
669 Analysis and interpretation of data, Drafting or revising the article, Contributed unpublished  
670 essential data or reagents. L.O, F.M and H.A.S.S Acquisition of data, Analysis and  
671 interpretation of data. D.F. is the principal investigator. All authors discussed the results and  
672 commented on the manuscript.

673

## 674 **References**

- 675 1. Apostolou, A., Shen, Y., Liang, Y., Luo, J., Fang, S. (2008). Armet, a UPR-  
676 upregulated protein, inhibits cell proliferation and ER stress-induced cell death. *Exp Cell Res.*  
677 314:2454-67. doi: 10.1016/j.yexcr.2008.05.001.
- 678 2. Bäck, S., Peränen, J., Galli, E., Pulkila, P., Lonka-Nevalaita, L., Tamminen, T.,  
679 Voutilainen, M.H., Raasmaja, A., Saarma, M., Männistö, P.T., Tuominen, R.K. (2013). Gene  
680 therapy with AAV2-CDNF provides functional benefits in a rat model of Parkinson's disease.  
681 *Brain Behav.* 3:75-88. doi: 10.1002/brb3.117.
- 682 3. Bagnó, L.L., Carvalho, D., Mesquita, F., Louzada, R.A., Andrade, B., Kasai-  
683 Brunswick, T.H., Lago, V.M., Suhett, G., Cipitelli, D., Werneck-de-Castro, J.P., Campos-de-



684 Carvalho, A.C. (2016). Sustained IGF-1 Secretion by Adipose-Derived Stem Cells Improves  
685 Infarcted Heart Function. *Cell Transplant.* 25:1609-1622. doi: 10.3727/096368915X690215.

686 4. Bai, M., Vozdek, R., Hnízda, A., Jiang, C., Wang, B., Kuchar, L., Li, T., Zhang, Y.,  
687 Wood, C., Feng, L., Dang, Y., Ma, D.K. (2018). Conserved roles of *C. elegans* and human  
688 MANFs in sulfatide binding and cytoprotection. *Nat Commun.* 9:897. doi: 10.1038/s41467-  
689 018-03355-0.

690 5. Becker, B., Shaebani, M.R., Rammo, D., Bubel, T., Santen, L., Schmitt, M.J. (2016).  
691 Cargo binding promotes KDEL receptor clustering at the mammalian cell surface. *Sci Rep.*  
692 6:28940. doi: 10.1038/srep28940.

693 6. Capitani, M., Sallese, M. (2009). The KDEL receptor: new functions for an old  
694 protein. *FEBS Lett.* 583:3863-71. doi: 10.1016/j.febslet.2009.10.053.

695 7. Dorner, A.J., Wasley, L.C., Raney, P., Haugejorden, S., Green, M., Kaufman, R.J.  
696 (1990). The stress response in Chinese hamster ovary cells. Regulation of ERp72 and protein  
697 disulfide isomerase expression and secretion. *J Biol Chem.* 265: 22029-34.

698 8. Doroudgar, S., Glembotski, C.C. (2011). The cardiokine story unfolds: ischemic  
699 stress-induced protein secretion in the heart. *Trends Mol Med.* 17:207-14. doi:  
700 10.1016/j.molmed.2010.12.003.

701 9. Gedik, N., Maciel, L., Schulte, C., Skyschally, A., Heusch, G., Kleinbongard, P.  
702 (2017). Cardiomyocyte mitochondria as targets of humoral factors released by remote  
703 ischemic preconditioning. *Arch Med Sci.* 13:448-458. doi: 10.5114/aoms.2016.61789.

704 10. Glembotski, C.C. (2011). Functions for the cardiomyokine, MANF, in  
705 cardioprotection, hypertrophy and heart failure. *J Mol Cell Cardiol.* 51:512-7. doi:  
706 10.1016/j.yjmcc.2010.10.008.

707 11. Glembotski, C.C., Thuerauf, D.J., Huang, C., Vekich, J.A., Gottlieb, R.A., Doroudgar,  
708 S. (2012). Mesencephalic astrocyte-derived neurotrophic factor protects the heart from  
709 ischemic damage and is selectively secreted upon sarco/endoplasmic reticulum calcium  
710 depletion. *J Biol Chem.* 287:25893-904. doi: 10.1074/jbc.M112.356345.

711 12. Hamada, H., Suzuki, M., Yuasa, S., Mimura, N., Shinozuka, N., Takada, Y., Suzuki,  
712 M., Nishino, T., Nakaya, H., Koseki, H., Aoe, T. (2004). Dilated cardiomyopathy caused by  
713 aberrant endoplasmic reticulum quality control in mutant KDEL receptor transgenic mice. *Mol*  
714 *Cell Biol.* 24:8007-17. doi: 10.1128/MCB.24.18.8007-8017.2004.

715 13. Hartley, C.L., Edwards, S., Mullan, L., Bell, P.A., Fresquet, M., Boot-Handford, R.P.,  
716 Briggs, M.D. (2013). Armet/Manf and Creld2 are components of a specialized ER stress

- 717 response provoked by inappropriate formation of disulphide bonds: implications for genetic  
718 skeletal diseases. *Hum Mol Genet.* 22:5262-75. doi: 10.1093/hmg/ddt383.
- 719 14. Hausenloy, D.J., Yellon, D.M. (2004). New directions for protecting the heart against  
720 ischaemia-reperfusion injury: targeting the Reperfusion Injury Salvage Kinase (RISK)-  
721 pathway. *Cardiovasc Res.* 61: 448-60. doi:10.1016/j.cardiores.2003.09.024
- 722 15. Henderson, M.J., Richie, C.T., Airavaara, M., Wang, Y., Harvey, B.K. (2013).  
723 Mesencephalic astrocyte-derived neurotrophic factor (MANF) secretion and cell surface  
724 binding are modulated by KDEL receptors. *J Biol Chem.* 288:4209-25. doi:  
725 10.1074/jbc.M112.400648.
- 726 16. Hetz, C. (2012). The unfolded protein response: controlling cell fate decisions under  
727 ER stress and beyond. *Nat Rev Mol Cell Biol.* 13:89-102. doi: 10.1038/nrm3270.
- 728 17. Heusch G. (2015). Molecular basis of cardioprotection: signal transduction in  
729 ischemic pre-, post, and remote conditioning. *Circ Res.* 116:674-99. doi:  
730 10.1161/CIRCRESAHA.116.305348.
- 731 18. Hummasti, S., Hotamisligil, G.S. (2010). Endoplasmic reticulum stress and  
732 inflammation in obesity and diabetes. *Circ Res.* 107:579-91. doi:  
733 10.1161/CIRCRESAHA.110.225698.
- 734 19. Kleinbongard, P., Gedik, N., Witting, P., Freedman, B., Klöcker, N., Heusch, G. 2015.  
735 Pleiotropic, heart rate-independent cardioprotection by ivabradine. *Br J Pharmacol.* 172:4380-  
736 90. doi: 10.1111/bph.13220.
- 737 20. Latge, C., Cabral, K.M., de Oliveira, G.A., Raymundo, D.P., Freitas, J.A., Johanson,  
738 L., Romão, L.F., Palhano, F.L., Herrmann, T., Almeida, M.S., Foguel, D. (2015). The Solution  
739 Structure and Dynamics of Full-length Human Cerebral Dopamine Neurotrophic Factor and  
740 Its Neuroprotective Role against  $\alpha$ -Synuclein Oligomers. *J Biol Chem.* 290:20527-40. doi:  
741 10.1074/jbc.M115.662254.
- 742 21. Lee, A.H., Iwakoshi, N.N., Glimcher, L.H. 2003. XBP-1 regulates a subset of  
743 endoplasmic reticulum resident chaperone genes in the unfolded protein response. *Mol Cell*  
744 *Biol.* 23:7448-59. doi: 10.1128/MCB.23.21.7448-7459.2003.
- 745 22. Lian, X., Zhang, J., Azarin, S.M., Zhu, K., Hazeltine, L.B., Bao, X., Hsiao, C., Kamp,  
746 T.J., Palecek, S.P. 2013. Directed cardiomyocyte differentiation from human pluripotent stem  
747 cells by modulating Wnt/beta-catenin signaling under fully defined conditions. *Nat Protoc.*  
748 8:162-75. doi: 10.1038/nprot.2012.150.
- 749 23. Lindahl, M., Danilova, T., Palm, E., Lindholm, P., Vöikar, V., Hakonen, E., Ustinov,  
750 J., Andressoo, J.O., Harvey, B.K., Otonkoski, T., Rossi, J., Saarma, M. 2014. MANF is

indispensable for the proliferation and survival of pancreatic  $\beta$  cells. *Cell Rep.* 7:366-75. doi: 10.1016/j.celrep.2014.03.023.

24. Lindahl, M., Saarma, M., Lindholm, P. 2017. Unconventional neurotrophic factors CDNF and MANF: Structure, physiological functions and therapeutic potential. *Neurobiol Dis.* 97:90-102. doi: 10.1016/j.nbd.2016.07.009.

25. Lindholm, P., Voutilainen, M.H., Laurén, J., Peränen, J., Leppänen, V.M., Andressoo, J.O., Lindahl, M., Janhunen, S., Kalkkinen, N., Timmusk, T., Tuominen, R.K., Saarma, M. 2007. Novel neurotrophic factor CDNF protects and rescues midbrain dopamine neurons in vivo. *Nature.* 448:73-7. doi:10.1038/nature05957.

26. Liu, H., Tang, X., Gong, L. 2015. Mesencephalic astrocyte-derived neurotrophic factor and cerebral dopamine neurotrophic factor: New endoplasmic reticulum stress response proteins. *Eur J Pharmacol.* 750:118-22. doi: 10.1016/j.ejphar.2015.01.016.

27. Liu, H., Yu, C., Yu, H., Zhong, L., Wang, Y., Liu, J., Zhang, S., Sun, J., Duan, L., Gong, L., Yang, J. 2018. Cerebral dopamine neurotrophic factor protects H9c2 cardiomyocytes from apoptosis. *Herz.* 43:346-351. doi: 10.1007/s00059-017-4564-3.

28. Maciel, L., de Oliveira, D.F., Verissimo da Costa, G.C., Bisch, P.M., Nascimento, J.H.M. 2017. Cardioprotection by the transfer of coronary effluent from ischaemic preconditioned rat hearts: identification of cardioprotective humoral factors. *Basic Res Cardiol.* 112:52. doi: 10.1007/s00395-017-0641-2.

29. Mizobuchi, N., Hoseki, J., Kubota, H., Toyokuni, S., Nozaki, J., Naitoh, M., Koizumi, A., Nagata, K. 2007. ARMET is a soluble ER protein induced by the unfolded protein response via ERSE-II element. *Cell Struct Funct.* 32:41-50. doi: 10.1247/csf.07001.

30. Neves, J., Zhu, J., Sousa-Victor, P., Konjikusic, M., Riley, R., Chew, S., Qi, Y., Jasper, H., Lamba, D.A. 2016. Immune modulation by MANF promotes tissue repair and regenerative success in the retina. *Science.* 353: aaf3646. doi: 10.1126/science.aaf3646.

31. Nishida, K., Otsu, K. 2017. Inflammation and metabolic cardiomyopathy. *Cardiovasc Res.* 113: 389-398. doi: 10.1093/cvr/cvx012.

32. Norisada, J., Hirata, Y., Amaya, F., Kiuchi, K., Oh-hash, K. 2016. A Comparative Analysis of the Molecular Features of MANF and CDNF. *PLoS One.* 11:e0146923. doi: 10.1371/journal.pone.0146923.

33. Oh-Hashi, K., Hirata, Y., Kiuchi, K. 2013. Transcriptional regulation of mouse mesencephalic astrocyte-derived neurotrophic factor in Neuro2a cells. *Cell Mol Biol Lett.* 18:398-415. doi: 10.2478/s11658-013-0096-x.

- 784 34. Oh-Hashi, K., Tanaka, K., Koga, H., Hirata, Y., Kiuchi, K. 2012. Intracellular  
785 trafficking and secretion of mouse mesencephalic astrocyte-derived neurotrophic factor. *Mol*  
786 *Cell Biochem.* 363:35-41. doi: 10.1007/s11010-011-1155-0.
- 787 35. Raykhel, I., Alanen, H., Salo, K., Jurvansuu, J., Nguyen, V.D., Latva-Ranta, M.,  
788 Ruddock, L. 2007. A molecular specificity code for the three mammalian KDEL receptors. *J*  
789 *Cell Biol.* 179:1193-204. doi: 10.1083/jcb.200705180.
- 790 36. Riffer, F., Eisfeld, K., Breinig, F., Schmitt, M.J. 2002. Mutational analysis of K28  
791 preprotoxin processing in the yeast *Saccharomyces cerevisiae* *Microbiology.* 148:1317-28.  
792 doi: 10.1099/00221287-148-5-1317.
- 793 37. Ruggiero, C., Grossi, M., Fragassi, G., Di Campli, A., Di Ilio, C., Luini, A., Sallese,  
794 M. 2017. The KDEL receptor signalling cascade targets focal adhesion kinase on focal  
795 adhesions and invadopodia. *Oncotarget.* 9:10228-10246. doi: 10.18632/oncotarget.23421.
- 796 38. Sampaio, T.B., Savall, A.S., Gutierrez, M.E.Z, Pinton, S. 2017. Neurotrophic factors  
797 in Alzheimer's and Parkinson's diseases: implications for pathogenesis and therapy. *Neural*  
798 *Regen Res.*12:549-557. doi: 10.4103/1673-5374.205084.
- 799 39. Sousa-Victor, P., Jasper, H., Neves, J. 2018 Trophic Factors in Inflammation and  
800 Regeneration: The Role of MANF and CDNF. *Front Physiol.* 9:1629. doi:  
801 10.3389/fphys.2018.01629.
- 802 40. Sun, Z.P., Gong, L., Huang, S.H., Geng, Z., Cheng, L., Chen, Z.Y. 2011. Intracellular  
803 trafficking and secretion of cerebral dopamine neurotrophic factor in neurosecretory cells. *J*  
804 *Neurochem.* 117:121-32. doi: 10.1111/j.1471-4159.2011.07179.x.
- 805 41. Tadimalla, A., Belmont, P.J., Thuerauf, D.J., Glassy, M.S., Martindale, J.J., Gude, N.,  
806 Sussman, M.A., Glembotski, C.C. 2008. Mesencephalic astrocyte-derived neurotrophic factor  
807 is an ischemia-inducible secreted endoplasmic reticulum stress response protein in the heart.  
808 *Circ Res.* 103:1249-58. doi: 10.1161/CIRCRESAHA.108.180679.
- 809 42. Trychta, K.A., Bäck, S., Henderson, M.J., Harvey, B.K. 2018. KDEL Receptors Are  
810 Differentially Regulated to Maintain the ER Proteome under Calcium Deficiency. *Cell Rep.*  
811 25:1829-1840.e6. doi: 10.1016/j.celrep.2018.10.055.
- 812 43. Voutilainen, M.H., Arumäe, U., Airavaara, M., Saarma, M. 2015. Therapeutic  
813 potential of the endoplasmic reticulum located and secreted CDNF/MANF family of  
814 neurotrophic factors in Parkinson's disease. *FEBS Lett.* 589:3739-48. doi:  
815 10.1016/j.febslet.2015.09.031.
- 816 44. Voutilainen, M.H., Bäck, S., Peränen, J., Lindholm, P., Raasmaja, A., Männistö, P.T.,  
817 Saarma, M., Tuominen, R.K. 2011. Chronic infusion of CDNF prevents 6-OHDA-induced

deficits in a rat model of Parkinson's disease. *Exp Neurol.* 228:99-108. doi: 10.1016/j.expneurol.2010.12.013.

45. Wilson, D.W., Lewis, M.J., Pelham, H.R. 1993. pH-dependent binding of KDEL to its receptor in vitro. *J Biol Chem.* 268: 7465-8.

46. Yellon, D.M., Hausenloy, D.J. 2007. Myocardial reperfusion injury. *N Engl J Med.* 357:1121-35. doi: 10.1056/NEJMra071667.

47. Zhang, G.L., Wang, L.H., Liu, X.Y., Zhang, Y.X., Hu, M.Y., Liu, L., Fang, Y.Y., Mu, Y., Zhao, Y., Huang, S.H., Liu, T., Wang, X.J. 2018. Cerebral Dopamine Neurotrophic Factor (CDNF) Has Neuroprotective Effects against Cerebral Ischemia That May Occur through the Endoplasmic Reticulum Stress Pathway. *Int J Mol Sci.* 19: E1905. doi: 10.3390/ijms19071905.

48. Zhang, Y., Tseng, C.C., Tsai, Y.L., Fu, X., Schiff, R., Lee, A.S. 2013. Cancer cells resistant to therapy promote cell surface relocation of GRP78 which complexes with PI3K and enhances PI(3,4,5)P3 production. *PLoS One.* 8: e80071. doi: 10.1371/journal.pone.0080071.

## Figures and legends

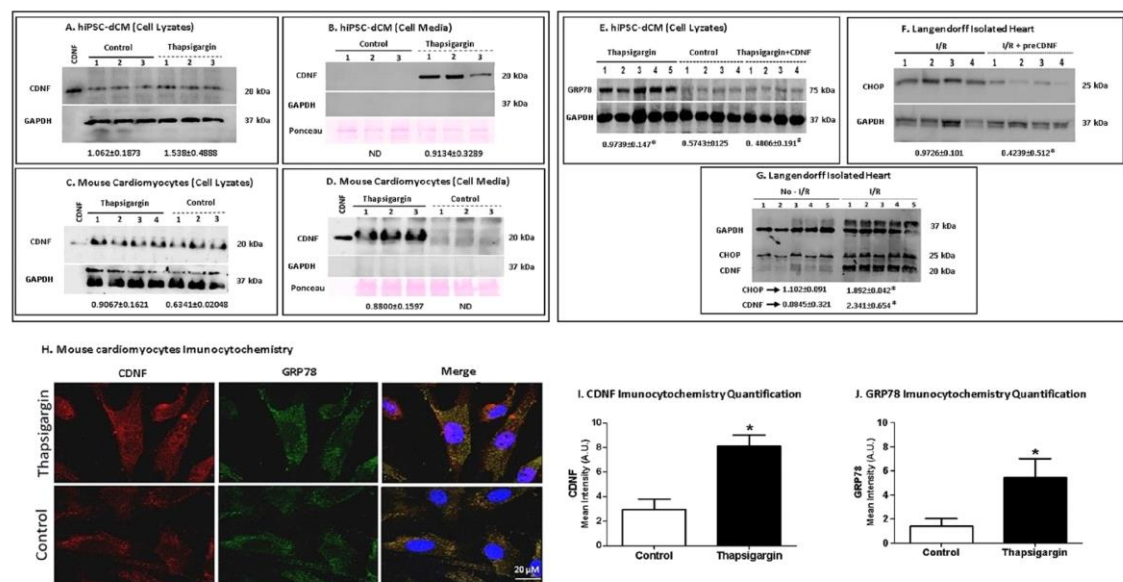

Figure 1: Thapsigargin (TG) treatment increases the levels of CDNF in human and

839 **mouse cardiomyocytes as well as its secretion to the extracellular media.** Human iPSC-  
840 dCM (**A, B**) or mouse cardiomyocytes (**C, D**) were treated for 20h with TG (1 $\mu$ mol/L). **CDNF**  
841 **blocks the TG- and I/R-induced increase in the levels of GRP78 and CHOP in hearts and**  
842 **human cardiomyocytes.** (**E**) Levels of GRP78 in cell extracts of hiPSC-dCM cultures treated  
843 with TG (1 $\mu$ mol/L) or with CDNF (1 $\mu$ mol/L) prior to TG. (**F**) Levels of CHOP and CDNF  
844 from rat hearts subjected to I/R protocol. (**G**) Levels of CHOP from hearts subjected to I/R  
845 after CDNF treatment (1 $\mu$ mol/L/5min). (**H**) Levels of CDNF and GRP78 in mouse  
846 cardiomyocytes before and after TG treatment, measured by confocal imaging. (**I and J**)  
847 Immunocytochemistry quantification of CDNF and GRP78. The levels of CDNF, GRP78 and  
848 CHOP are normalized to GAPDH levels in cell lysate and to Ponceau red in extracellular  
849 media. Recombinant CDNF was used as control. Each lane represents a different cell culture  
850 and the quantifications of protein expression ( $\pm$  S.E.M.) are shown below each blot. \*P<0.05  
851 vs. control and #P<0.05 vs. TG. ND, not detected.

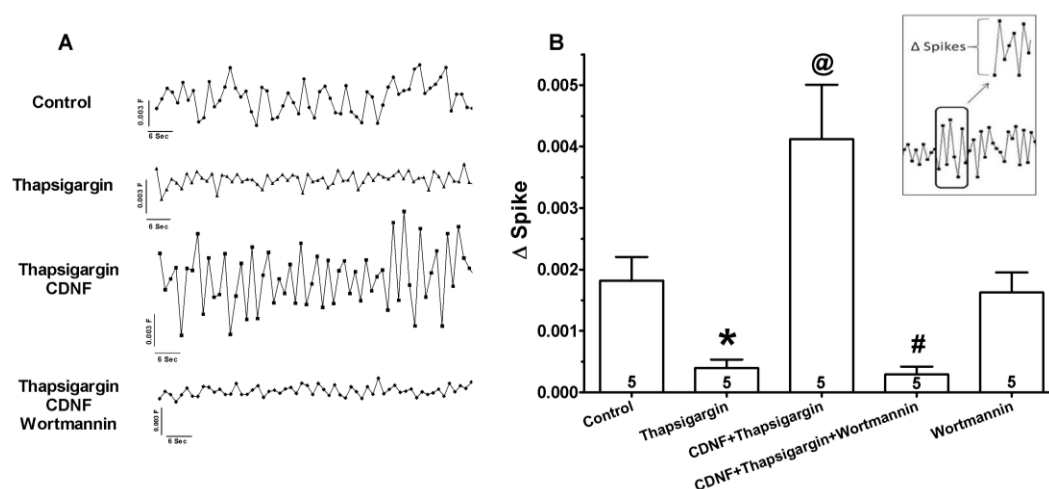

852  
853 **Figure 2: ExoCDNF restores the calcium transient in hiPSC-dCM perturbed by TG**  
854 **treatment, and wortmannin abrogates this beneficial effect of CDNF.** Groups: Control,  
855 TG, TG+CDNF and TG+CDNF+wortmannin (**representative traces in panel A**). (**B**)  $\Delta$ Spike  
856 (average of 20 peaks for each experiment) represents the difference between the calcium level  
857 in a specific top peak in relation to the previous lower peak (see the inset) Data are means  $\pm$   
858 S.E.M. Number inside each column is *n* of hiPSC-dCM cultures tested. \*P<0.01 vs. control;  
859 @P<0.01 vs. TG and #P<0.01 vs. CDNF+TG.

860



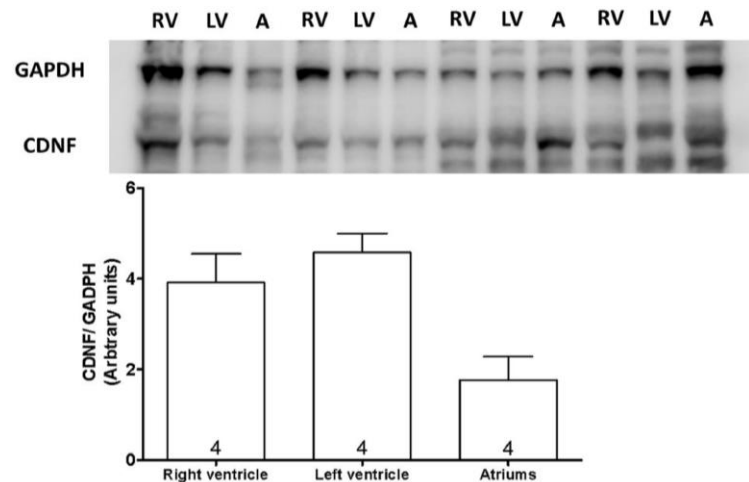

861  
862 **Figure 3: Endogenous CDNF expression in rat heart chambers.** Extracts from different  
863 heart compartments (50 $\mu$ g protein) were fractionated by SDS-PAGE followed by  
864 immunoblotting for CDNF and GAPDH. The levels of CDNF were estimated by normalizing  
865 the intensity of the CDNF band to the GAPDH band as shown in the graph. Data are means  $\pm$   
866 S.E.M. Number in each column is  $n$  of hearts. RV= right ventricle; LV = left ventricle; A =  
867 atria. Fresh untreated hearts were used in these experiments.

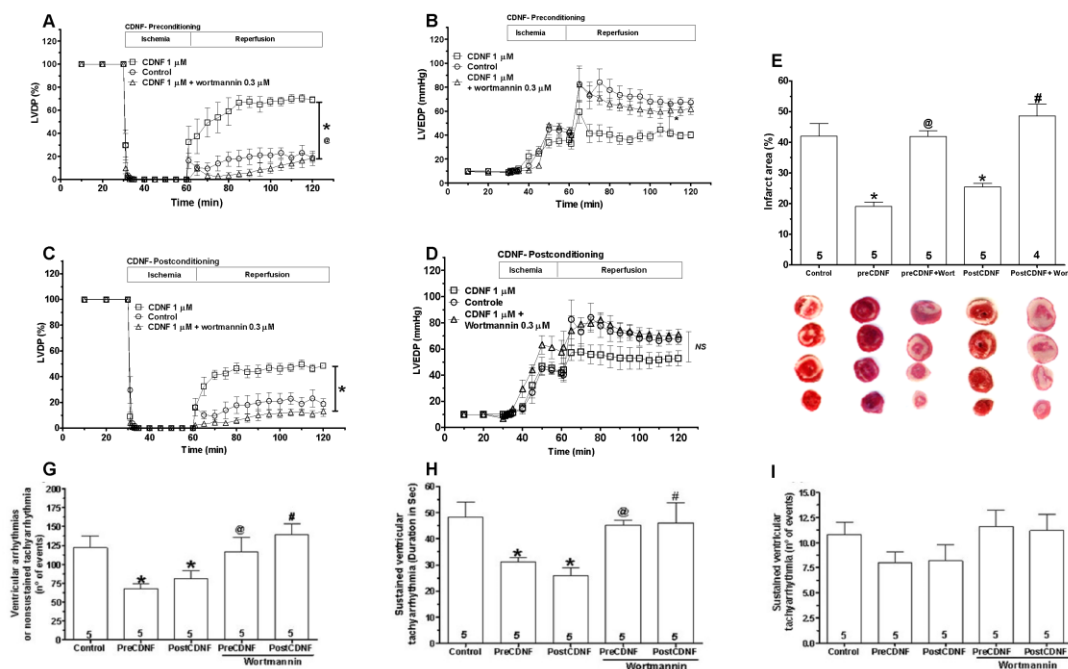

868  
869 **Figure 4: ExoCDNF protects intact rat hearts from injuries provoked by I/R and**  
870 **protection is prevented by wortmannin, a PI3K/AKT antagonist.** Time courses of left  
871 ventricular developed pressure (LVDP) (A, C) and left ventricular end-diastolic pressure  
872 (LVEDP) (B, D) during I/R protocol. In A and B, CDNF (1 $\mu$ mol/L) was perfused 5min before



873 ischemia (preconditioning) and in **C** and **D**, during the first 5min of reperfusion  
874 (postconditioning). Wortmannin (0.3 $\mu$ mol/L) was perfused 5min before CDNF. **(E) Infarct**  
875 **area of hearts.** Representative cross-section images of TCC-stained ventricle hearts subjected  
876 to I/R. **(F)** Number of ventricular arrhythmia or nonsustained tachyarrhythmia events or **(G)**  
877 Number of events and **(H)** the duration of sustained ventricular tachyarrhythmia produced  
878 during reperfusion. Values are expressed as means  $\pm$  S.E.M. Number in each column is *n* of  
879 hearts. \*  $P < 0.01$  vs control; @  $P < 0.01$  vs preCDNF and #  $P < 0.01$  vs postCDNF.

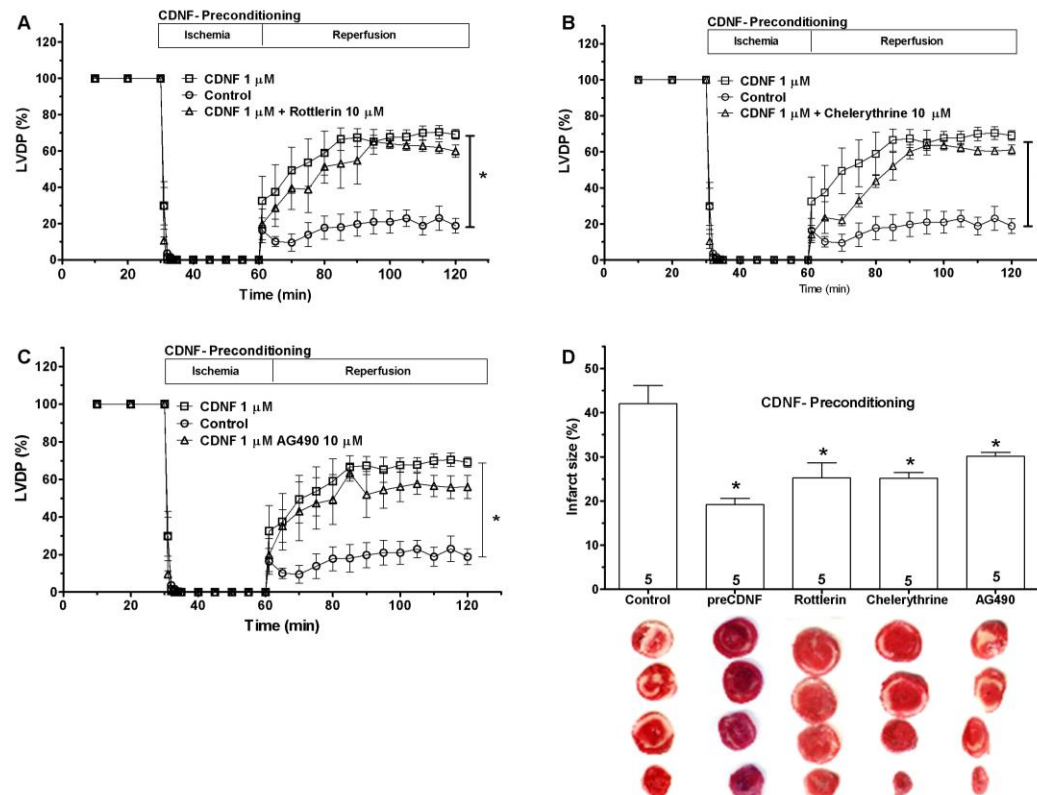

880  
881 **Figure 5: The cardioprotective activity of CDNF is not prevented by rottlerin (A),**  
882 **chelerythrine (B) or AG490 (C).** Time courses of left ventricular developed pressure (LVDP)  
883 during I/R protocol (30min of global ischemia and 60 min of reperfusion) or when the hearts  
884 were subjected to a previous perfusion with CDNF (1 $\mu$ mol/L/5 min - preconditioning) or with  
885 CDNF+inhibitor (5min before I/R). Controls (**circles**), CDNF treatment (**squares**) and  
886 CDNF+inhibitor (**triangles**). **(D) Rottlerin, chelerythrine and AG490 do not counteract the**  
887 **protective effect of CDNF in reducing the infarct area of hearts subjected to I/R.**  
888 Representative cross-sections of TCC-stained ventricles and quantification of control hearts  
889 subjected to I/R only, or I/R after preconditioning with CDNF or with CDNF and inhibitors.  
890 Numbers inside each bar are the number of hearts used. Data are means  $\pm$  S.E.M. \* $P < 0.001$   
891 vs. control.

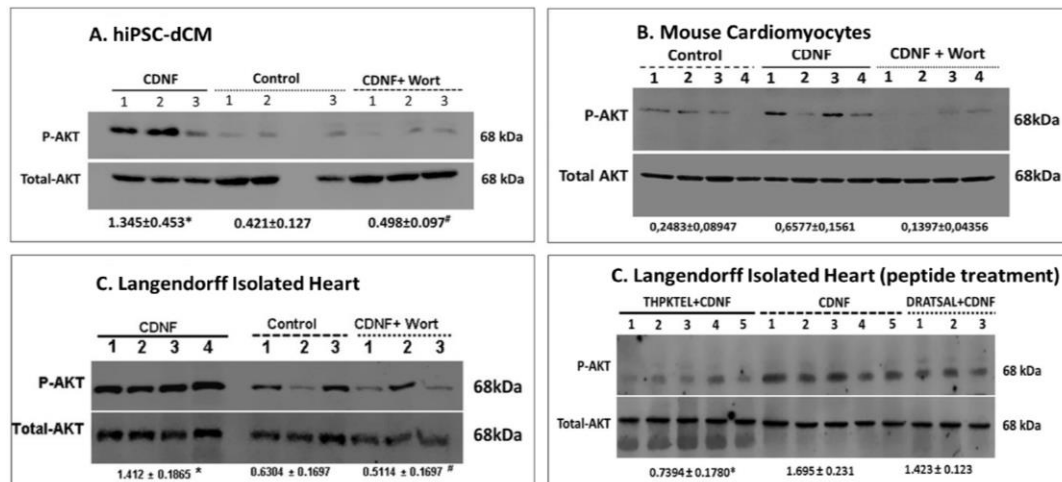

892  
893 **Figure 6. ExoCDNF treatment increases the level of phosphorylated AKT (p-Akt) in rat**  
894 **isolated hearts and in mouse and human cardiomyocytes.** Cultures of (A) hiPSC-dCM or  
895 (B) mouse cardiac myocytes were treated with CDNF (1μmol/L/20h) or with wortmannin  
896 (0.3μmol/L/15min) before CDNF addition. In (C), rat isolated hearts were perfused with  
897 CDNF (1μmol/L/5min, preconditioning) before I/R either alone or in combination with  
898 wortmannin (0.3μmol/L/5min) before CDNF treatment. The intensities of the p-Akt bands  
899 were normalized to total-AKT levels. (D) **The peptide THPKTEL that binds to the KDEL-**  
900 **R at the cell membrane blocks CDNF-induced PI3K/AKT activation.** Rat isolated hearts  
901 were perfused with CDNF (1μmol/L/5min, preconditioning) before I/R either alone or in  
902 combination with THPKTEL or with the scrambled peptide DRATSAL (peptides added 5min  
903 before CDNF treatment and during the 5min CDNF treatment). The number of experiments is  
904 equal to number of lanes. \*P<0.001 vs. control #P<0.01 vs. CDNF.

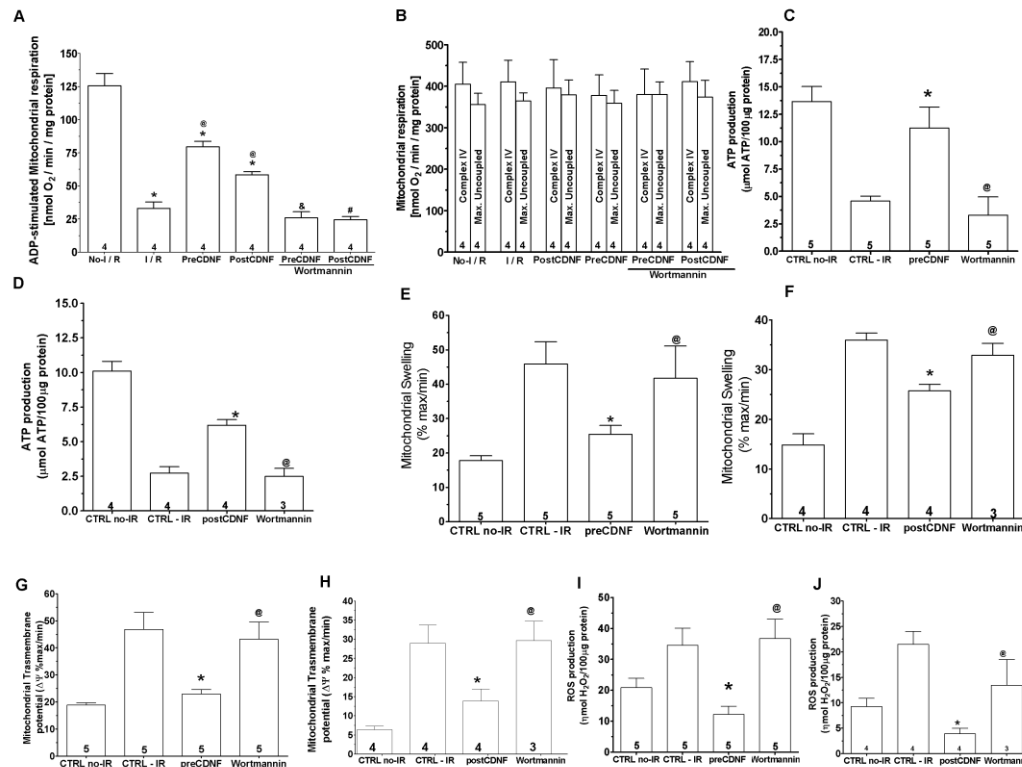

**Figure 7. ExoCDNF reduces cardiac mitochondrial impairment induced by I/R and wortmannin abrogates the CDNF beneficial effects.** (A) ADP-Stimulated complex I respiration; (B) Complex IV and maximal uncoupled oxygen respiration; (C, D) ATP production; (E, F) Mitochondrial swelling (G, H) Mitochondrial transmembrane potential ( $\Delta\Psi$ ) and (I, J) Reactive oxygen species (ROS) production. Groups: No-I/R, I/R, preCDNF, postCDNF and preCDNF+Wortmannin and postCDNF+Wortmannin. In (C- I) preconditioning with CDNF or with CDNF+Wortmannin. In (D- J) postconditioning with CDNF and CDNF+Wortmannin. \*P<0.05 vs. I/R; @P<0.05 vs. No-I/R; &P<0.05 vs. preCDNF and #P<0.05 vs. postCDNF. Number in each column is n of hearts.

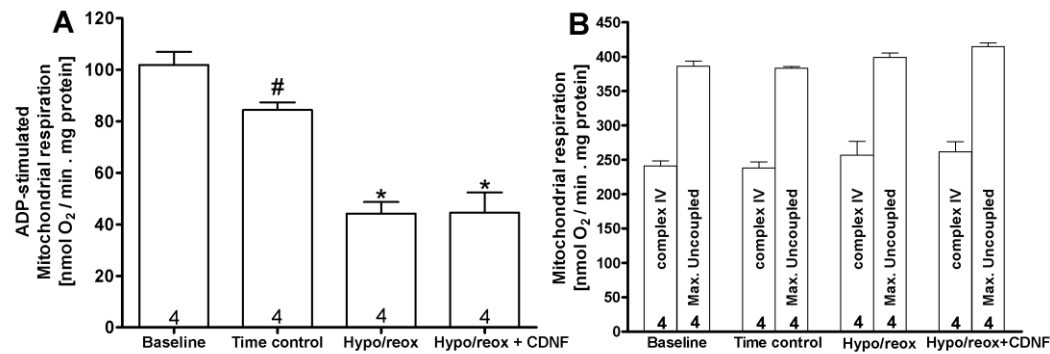

**Figure 8: CDNF does not protect isolated mitochondria from hypoxia/reoxygenation. (A)** ADP-Stimulated complex I respiration and **(B)** Complex IV-induced respiration with TMPD and ascorbate, compared to the maximal uncoupled oxygen uptake with FCCP present. The mitochondria were isolated from naive rat hearts and then subjected to hypoxia/reoxygenation in the absence or in the presence of CDNF (1μmol/L). Groups: Baseline; Time control =10 min of mitochondria incubation in the chamber before the experiment; Hypo/reox=10min of hypoxia followed by reoxygenation; Hypo/reox+CDNF=CDNF incubation (1μmol/L) before Hypo/reox. \*P<0.05 vs. time control; #P<0.05 vs. baseline. Number in each bar is n of hearts.

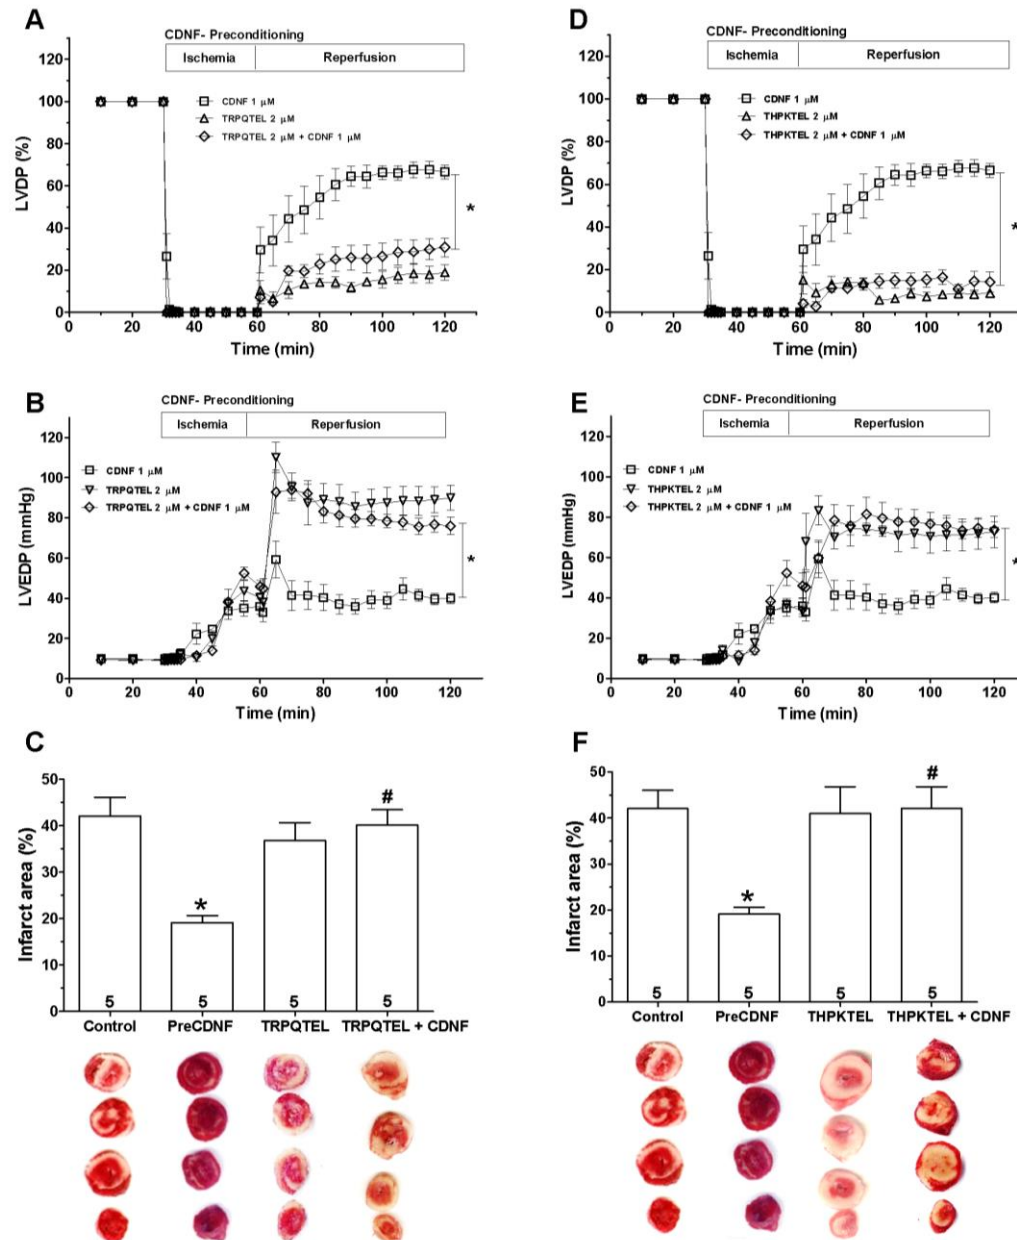

**Figure 9: The cardioprotective effect of exoCDNF is blocked by heptapeptides that bind to KDEL-R.** Time courses of left ventricular developed pressure (LVDP) (A, D) and left ventricular end-diastolic pressure (LVEDP) (B, E) during I/R protocol. CDNF (1 $\mu$ mol/L), peptide (in A and B, TRPQTEL and in C and E, THPKTEL; 2 $\mu$ mol/L of each peptide) or CDNF (1 $\mu$ mol/L)+peptide (2 $\mu$ mol/L) were perfused before ischemia (5min). (C, F) **infarct area of hearts.** Representative cross-section images of TCC-stained ventricles hearts subjected to I/R. Data are means  $\pm$  S.E.M of 5 hearts. \*P<0.001 vs. control; #P<0.001 vs. preCDNF.

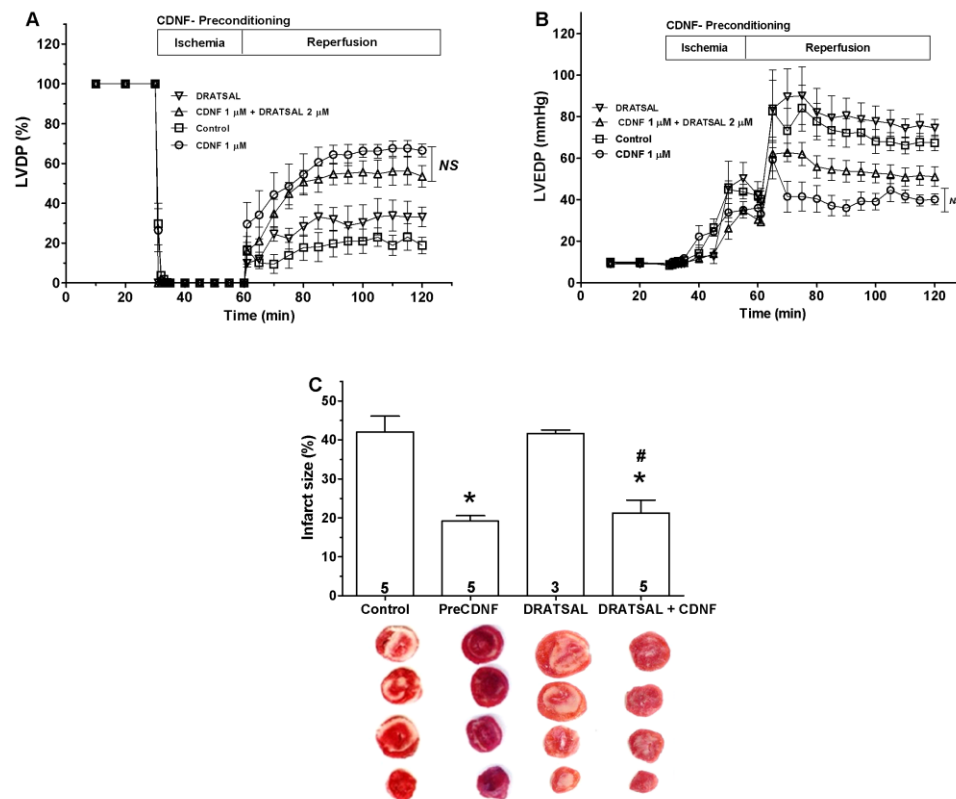

934  
935 **Figure 10: The cardioprotective effect of exoCDNF is not blocked by the scrambled**  
936 **peptide DRATSAL.** Time course of (A) left ventricular developed pressure (LVDP) and (B)  
937 left ventricular end-diastolic pressure (LVEDP) during I/R protocol (30min of global ischemia  
938 and 60min of reperfusion). As indicated by the different tracings, CDNF (1 $\mu$ mol/L), peptide  
939 (DRATSAL, 2 $\mu$ mol/L) or CDNF (1 $\mu$ mol/L)+DRATSAL (2 $\mu$ mol/L) were perfused before  
940 ischemia (5min). Control (squares), CDNF (circles), DRATSAL alone (inverted triangles)  
941 and CDNF+DRATSAL (triangles). (C) **DRATSAL did not block the decrease in infarct**  
942 **area induced by CDNF after I/R.** Representative cross-sections of TCC-stained ventricles  
943 and quantification of control hearts subjected to I/R or after preconditioning with CDNF,  
944 DRATSAL alone or CDNF+DRATSAL. Data are means  $\pm$  S.E.M. The number of hearts used  
945 in each experiment is shown inside the bars. \*P < 0.001 vs. control; #P < 0.001 vs. DRATSAL.

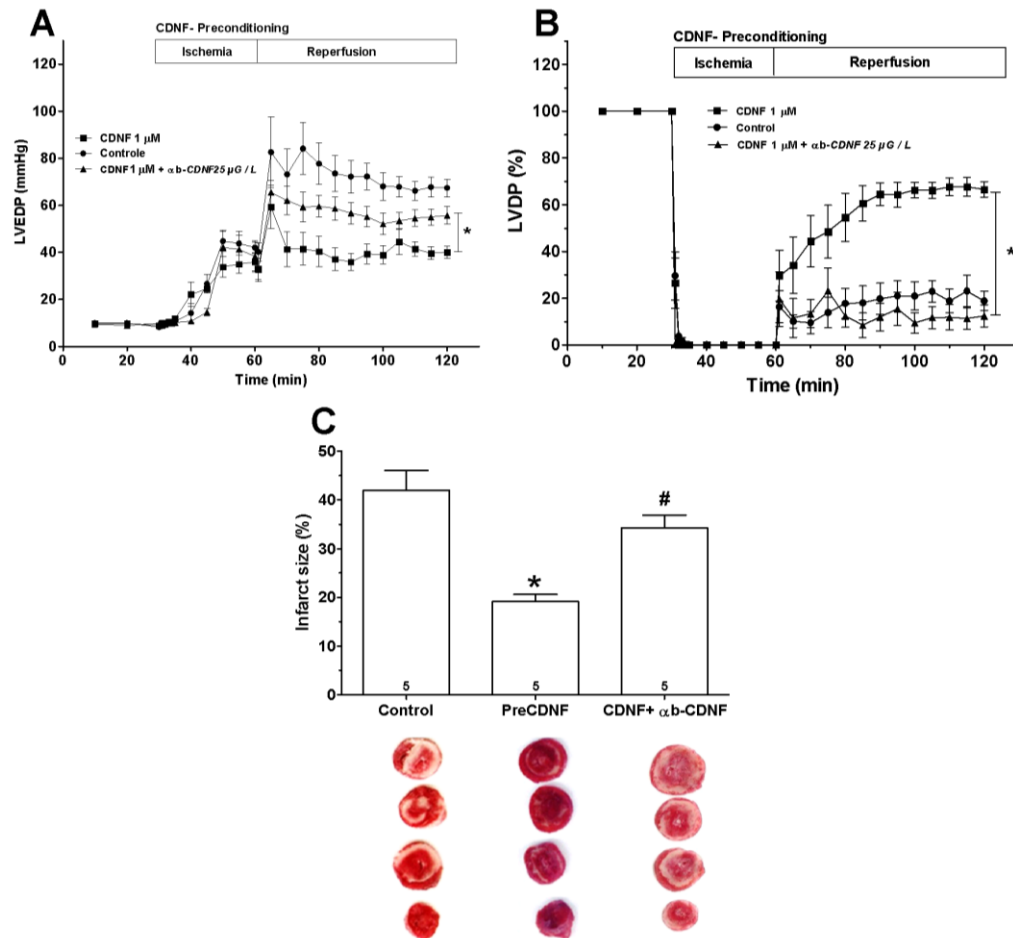

946  
947 **Figure 11: The cardioprotective effect of preconditioning with exoCDNF is blocked by an**  
948 **anti-CDNF antibody.** Time courses of (A) left ventricular developed pressure (LVDP) and  
949 (B) left ventricular end-diastolic pressure (LVEDP) during I/R protocol and (C) Infarcted area.  
950 CDNF (1  $\mu$ mol/L) or CDNF+antibody were perfused before ischemia (5min). In C,  
951 Representative cross-section images of TCC-stained ventricles hearts subjected to I/R. Data  
952 are means  $\pm$  S.E.M of 5 hearts. \*P<0.001 vs. control; #P<0.001 vs. preCDNF.



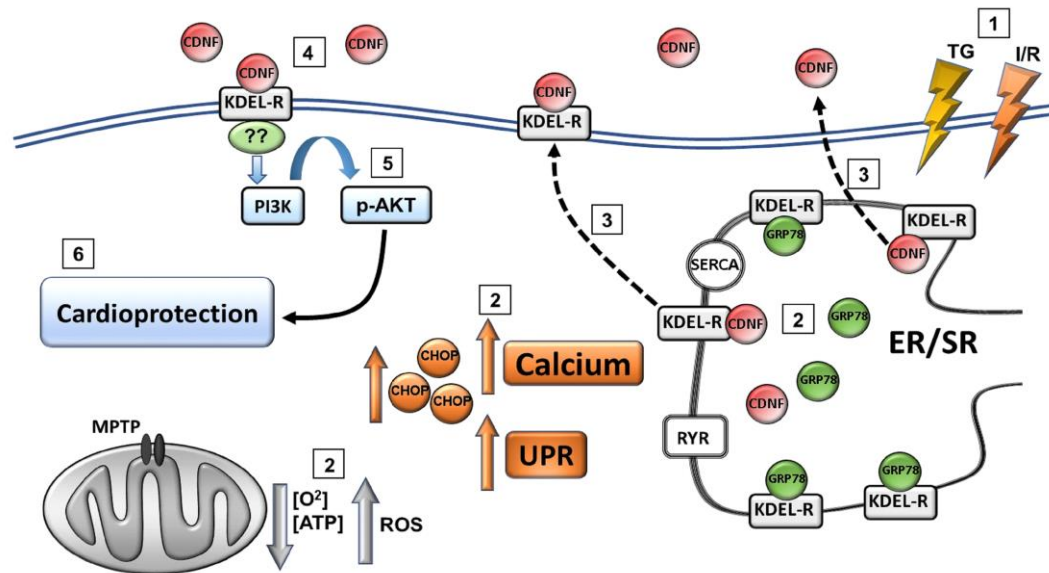

953

954 **Figure 12: Schematic representation of the main findings of the present study. (1) TG or**  
955 **I/R induce cellular injuries causing (2) an increase in cytosolic calcium and UPR activation, up**  
956 **regulation of GRP78, CDNF and CHOP, as well as mitochondria impairment (decrease in [O<sub>2</sub>]**  
957 **and [ATP] and an increase in [ROS]). (3) CDNF is an ER/SR-resident protein remaining**  
958 **bound to KDEL-R through its degenerated KTEL sequence located at the C-terminal end.**  
959 **Under stress, KDEL-R and CDNF dissociate and migrate from the ER/SR to the cell**  
960 **membrane and extracellular milieu, respectively, (4) allowing the binding of CDNF to the**  
961 **KDEL-R at the cell surface with the subsequent (5) activation of PI3K/AKT signaling**  
962 **pathway either directly or indirectly conferring (6) cardioprotection to the cells. RYR=**  
963 **ryanodine receptor – releases calcium from the ER/SR; SERCA = sarco/endoplasmic**  
964 **reticulum Ca<sup>2+</sup>-ATPase – pumps calcium from the cytosol to the ER/SR; MPTP =**  
965 **mitochondrial permeability transition pore.**

966

967 **Table 1: Left ventricular developed pressure of isolated perfused rat**  
968 **hearts in mmHg.**

| Groups        | Time               | Rat hearts LVDP [mmHg] |   |      |
|---------------|--------------------|------------------------|---|------|
| Control (n=5) | baseline           | 103.1                  | ± | 8.9  |
|               | after intervention | 97.9                   | ± | 14.3 |
| preCDNF (n=5) | baseline           | 102.5                  | ± | 11.2 |
|               | after intervention | 97.9                   | ± | 14.3 |

|                                                |                           |              |          |              |
|------------------------------------------------|---------------------------|--------------|----------|--------------|
| <b>postCDNF(n=5)</b>                           | <b>baseline</b>           | <b>101.9</b> | <b>±</b> | <b>18.2</b>  |
| <b>preCDNF<br/>+Wortmannin (n=5)</b>           | <b>baseline</b>           | <b>95.7</b>  | <b>±</b> | <b>8.3</b>   |
|                                                | <b>after intervention</b> | <b>88.3</b>  | <b>±</b> | <b>10.2</b>  |
| <b>postCDNF<br/>+Wortmannin (n=5)</b>          | <b>baseline</b>           | <b>111.5</b> | <b>±</b> | <b>10.7</b>  |
| <b>preCDNF+<br/>TRPQTEL(n=5)</b>               | <b>baseline</b>           | <b>102.3</b> | <b>±</b> | <b>15.1</b>  |
|                                                | <b>after intervention</b> | <b>96.1</b>  | <b>±</b> | <b>7.2</b>   |
| <b>preCDNF+<br/>THPKTEL(n=5)</b>               | <b>baseline</b>           | <b>97.6</b>  | <b>±</b> | <b>8.1</b>   |
|                                                | <b>after intervention</b> | <b>91.7</b>  | <b>±</b> | <b>13.4</b>  |
| <b>preCDNF+<br/>DRATSAL(n=5)</b>               | <b>baseline</b>           | <b>99.3</b>  | <b>±</b> | <b>13.2</b>  |
|                                                | <b>after intervention</b> | <b>102.4</b> | <b>±</b> | <b>6.9</b>   |
| <b>PreCDNF+<br/>αβ-CDNF(n=5)</b>               | <b>baseline</b>           | <b>107.4</b> | <b>±</b> | <b>10.4</b>  |
|                                                | <b>after intervention</b> | <b>98.3</b>  | <b>±</b> | <b>8.2</b>   |
| <b>No-I/R (n=9)<br/>(mitochondria assay)</b>   | <b>baseline</b>           | <b>101.6</b> | <b>±</b> | <b>6.9</b>   |
| <b>I/R (n=9)<br/>(mitochondria assay)</b>      | <b>baseline</b>           | <b>104.2</b> | <b>±</b> | <b>8.8</b>   |
|                                                | <b>ischemia 5 min</b>     | <b>0.0</b>   | <b>±</b> | <b>0.0</b>   |
|                                                | <b>ischemia 30 min</b>    | <b>0.0</b>   | <b>±</b> | <b>0.0</b>   |
|                                                | <b>reperfusion 10 min</b> | <b>14.1</b>  | <b>±</b> | <b>16.3</b>  |
| <b>preCDNF (n=5)<br/>(mitochondria assay)</b>  | <b>baseline</b>           | <b>110.8</b> | <b>±</b> | <b>7.5</b>   |
|                                                | <b>after intervention</b> | <b>105.3</b> | <b>±</b> | <b>15.9</b>  |
|                                                | <b>ischemia 5 min</b>     | <b>0.0</b>   | <b>±</b> | <b>0.0</b>   |
|                                                | <b>ischemia 30 min</b>    | <b>0.0</b>   | <b>±</b> | <b>0.0</b>   |
|                                                | <b>reperfusion 10 min</b> | <b>43.9</b>  | <b>±</b> | <b>7.6 *</b> |
| <b>PostCDNF (n=4)<br/>(mitochondria assay)</b> | <b>baseline</b>           | <b>99.8</b>  | <b>±</b> | <b>10.9</b>  |
|                                                | <b>after intervention</b> | <b>100.2</b> | <b>±</b> | <b>8.3</b>   |
|                                                | <b>ischemia 5 min</b>     | <b>0.0</b>   | <b>±</b> | <b>0.0</b>   |
|                                                | <b>ischemia 30 min</b>    | <b>0.0</b>   | <b>±</b> | <b>0.0</b>   |
|                                                | <b>reperfusion 10 min</b> | <b>33.7</b>  | <b>±</b> | <b>11.4</b>  |

|                                                                |                           |              |          |                   |
|----------------------------------------------------------------|---------------------------|--------------|----------|-------------------|
| <b>preCDNF<br/>+Wortmannin (n=5)<br/>(mitochondria assay)</b>  | <b>baseline</b>           | <b>113.3</b> | <b>±</b> | <b>11.6</b>       |
|                                                                | <b>after intervention</b> | <b>102.0</b> | <b>±</b> | <b>6.1</b>        |
|                                                                | <b>ischemia 5 min</b>     | <b>0.0</b>   | <b>±</b> | <b>0.0</b>        |
|                                                                | <b>ischemia 30 min</b>    | <b>0.0</b>   | <b>±</b> | <b>0.0</b>        |
|                                                                | <b>reperfusion 10 min</b> | <b>15.9</b>  | <b>±</b> | <b>14.3 &amp;</b> |
| <b>postCDNF<br/>+Wortmannin (n=3)<br/>(mitochondria assay)</b> | <b>baseline</b>           | <b>102.1</b> | <b>±</b> | <b>19.7</b>       |
|                                                                | <b>after intervention</b> | <b>93.5</b>  | <b>±</b> | <b>15.4</b>       |
|                                                                | <b>ischemia 5 min</b>     | <b>0.0</b>   | <b>±</b> | <b>0.0</b>        |
|                                                                | <b>ischemia 30 min</b>    | <b>0.0</b>   | <b>±</b> | <b>0.0</b>        |
|                                                                | <b>reperfusion 10 min</b> | <b>11.3</b>  | <b>±</b> | <b>12.5 \$</b>    |

969 Mean of maximal developed left ventricular pressure (LVDP) of isolated perfused rat hearts.  
970 The LVDP was analyzed at different time points: at baseline, after the intervention, at 5 and 30  
971 min of ischemia, and at 10 min of reperfusion, respectively. Mean ± SEM. \* P< 0.05 vs I/R, &  
972 P< 0.05 vs preCDNF, \$ P< 0.05 vs postCDNF.  
973
